# Supplementary material for: The Effect of Green Extraction Technologies on the Chemical Composition of Medicinal Chaga Mushroom Extracts
Source: MDPI journal article supplement (doi:10.3390/jof10030225), 2024-03-19
Supplement: s1 [file s1]

**Table S1.** Free Sugar and sugar alcohol profile of Mongolian *I. obliquus* extracts obtained by different green extraction techniques (g/kg).

| g/kg  |     | IM-MW<br>96%<br>ETOH | IM-<br>MW<br>50%<br>ETOH | IM-<br>MW<br>water  | IM-<br>VAE<br>96%<br>ETOH | IM-<br>VAE<br>50%<br>ETOH | IM-<br>VAE<br>water | IM-<br>SWE<br>200°C | IM-<br>SWE<br>120°C  |
|-------|-----|----------------------|--------------------------|---------------------|---------------------------|---------------------------|---------------------|---------------------|----------------------|
| Sor   | avg | 1.552                | 1.986                    | 2.014               | 2.024                     | 2.236                     | 2.526               | 4.775               | 4.769                |
|       | sd  | 0.021 <sup>bc</sup>  | 0.034 <sup>e</sup>       | 0.022 <sup>e</sup>  | 0.053 <sup>e</sup>        | 0.085 <sup>f</sup>        | 0.102 <sup>g</sup>  | 0.039 <sup>i</sup>  | 0.118 <sup>i</sup>   |
|       | RSD | 1.350                | 1.712                    | 1.112               | 2.622                     | 3.790                     | 4.028               | 0.824               | 2.472                |
| Tre   | avg | 0.256                | 0.335                    | 0.825               | 0.785                     | 0.896                     | 0.994               | 1.107               | 0.606                |
|       | sd  | 0.003 <sup>ab</sup>  | 0.005 <sup>cd</sup>      | 0.009 <sup>i</sup>  | 0.013 <sup>i</sup>        | 0.020 <sup>j</sup>        | 0.022 <sup>k</sup>  | 0.031 <sup>l</sup>  | 0.004 <sup>g</sup>   |
|       | RSD | 1.108                | 1.464                    | 1.102               | 1.684                     | 2.270                     | 2.164               | 2.770               | 0.670                |
| Ara   | avg | 0.452                | 0.501                    | 0.689               | 1.087                     | 1.552                     | 1.583               | 1.715               | 1.645                |
|       | sd  | 0.010 <sup>d</sup>   | 0.011 <sup>d</sup>       | 0.017 <sup>e</sup>  | 0.023 <sup>f</sup>        | 0.032 <sup>h</sup>        | 0.026 <sup>h</sup>  | 0.042 <sup>j</sup>  | 0.033 <sup>ij</sup>  |
|       | RSD | 2.170                | 2.104                    | 2.462               | 2.136                     | 2.046                     | 1.316               | 2.470               | 1.992                |
| Glu   | avg | 16.789               | 18.663                   | 21.023              | 22.657                    | 25.852                    | 28.114              | 64.545              | 54.842               |
|       | sd  | 0.316 <sup>a</sup>   | 0.371 <sup>b</sup>       | 0.368 <sup>c</sup>  | 0.044 <sup>cd</sup>       | 0.036 <sup>f</sup>        | 0.571 <sup>h</sup>  | 0.733 <sup>k</sup>  | 0.924 <sup>j</sup>   |
|       | RSD | 1.884                | 1.986                    | 1.750               | 0.104                     | 0.064                     | 0.904               | 1.136               | 1.684                |
| Fru   | avg | 7.996                | 8.322                    | 11.356              | 4.332                     | 6.332                     | 12.536              | 2.262               | 4.277                |
|       | sd  | 0.079 <sup>d</sup>   | 0.110 <sup>d</sup>       | 0.168 <sup>f</sup>  | 0.062 <sup>b</sup>        | 0.104 <sup>c</sup>        | 0.221 <sup>g</sup>  | 0.062 <sup>a</sup>  | 0.107 <sup>b</sup>   |
|       | RSD | 0.986                | 1.316                    | 1.482               | 1.424                     | 1.644                     | 1.764               | 2.730               | 2.512                |
| Sac   | avg | 5.663                | 8.652                    | 13.223              | 5.214                     | 7.896                     | 10.336              | 0.931               | 0.990                |
|       | sd  | 0.151 <sup>f</sup>   | 0.210 <sup>h</sup>       | 0.415 <sup>j</sup>  | 0.128 <sup>f</sup>        | 0.204 <sup>g</sup>        | 0.312 <sup>i</sup>  | 0.027 <sup>b</sup>  | 0.025 <sup>b</sup>   |
|       | RSD | 2.672                | 2.428                    | 3.136               | 2.446                     | 2.589                     | 3.023               | 2.874               | 2.552                |
| Tur   | avg | 1.332                | 1.542                    | 1.986               | 0.908                     | 1.425                     | 1.789               | 6.623               | 8.758                |
|       | sd  | 0.042 <sup>bc</sup>  | 0.055 <sup>cd</sup>      | 0.061 <sup>e</sup>  | 0.037 <sup>a</sup>        | 0.063 <sup>bc</sup>       | 0.092 <sup>de</sup> | 0.109 <sup>g</sup>  | 0.376 <sup>h</sup>   |
|       | RSD | 3.185                | 3.582                    | 3.050               | 4.117                     | 4.413                     | 5.123               | 1.648               | 4.290                |
| Gly   | avg | 2.145                | 3.562                    | 5.333               | 0.881                     | 1.224                     | 1.456               | 1.211               | 1.192                |
|       | sd  | 0.054 <sup>de</sup>  | 0.118 <sup>g</sup>       | 0.122 <sup>h</sup>  | 0.073 <sup>a</sup>        | 0.144 <sup>b</sup>        | 0.132 <sup>bc</sup> | 0.035 <sup>b</sup>  | 0.117 <sup>ab</sup>  |
|       | RSD | 2.523                | 3.321                    | 2.285               | 8.285                     | 11.784                    | 9.095               | 2.900               | 9.785                |
| Galk  | avg | 1.985                | 2.356                    | 3.014               | 1.012                     | 1.109                     | 1.552               | 1.389               | 1.483                |
|       | sd  | 0.062 <sup>ef</sup>  | 0.055 <sup>g</sup>       | 0.091 <sup>h</sup>  | 0.024 <sup>a</sup>        | 0.023 <sup>a</sup>        | 0.052 <sup>bc</sup> | 0.056 <sup>b</sup>  | 0.079 <sup>bc</sup>  |
|       | RSD | 3.149                | 2.328                    | 3.018               | 2.378                     | 2.048                     | 3.368               | 4.021               | 5.300                |
| Gal   | avg | 2.992                | 3.145                    | 4.025               | 0.986                     | 1.537                     | 3.665               | 5.545               | 3.572                |
|       | sd  | 0.159 <sup>d</sup>   | 0.251 <sup>de</sup>      | 0.179 <sup>fg</sup> | 0.044 <sup>a</sup>        | 0.061 <sup>b</sup>        | 0.062 <sup>ef</sup> | 0.240 <sup>l</sup>  | 0.151 <sup>ef</sup>  |
|       | RSD | 5.300                | 7.984                    | 4.456               | 4.456                     | 3.984                     | 1.692               | 4.332               | 4.228                |
| Rib   | avg | 1.856                | 2.563                    | 3.222               | 0.117                     | 0.853                     | 1.114               | 0.965               | 1.314                |
|       | sd  | 0.058 <sup>g</sup>   | 0.101 <sup>h</sup>       | 0.131 <sup>l</sup>  | 0.006 <sup>a</sup>        | 0.051 <sup>b</sup>        | 0.048 <sup>cd</sup> | 0.038 <sup>bc</sup> | 0.064 <sup>def</sup> |
|       | RSD | 3.140                | 3.944                    | 4.056               | 5.370                     | 6.028                     | 4.272               | 3.970               | 4.884                |
| iMAL  | avg | 0.837                | 0.968                    | 1.025               | 0.223                     | 0.573                     | 1.063               | 1.588               | 1.616                |
|       | sd  | 0.058 <sup>e</sup>   | 0.058 <sup>f</sup>       | 0.073 <sup>f</sup>  | 0.012 <sup>b</sup>        | 0.020 <sup>cd</sup>       | 0.061 <sup>f</sup>  | 0.019 <sup>i</sup>  | 0.053 <sup>i</sup>   |
|       | RSD | 6.970                | 5.992                    | 7.136               | 5.504                     | 3.552                     | 3.874               | 1.224               | 3.256                |
| iMALT | avg | 0.585                | 0.677                    | 0.985               | 0.658                     | 0.985                     | 1.112               | 0.791               | 0.809                |
|       | sd  | 0.027 <sup>bc</sup>  | 0.052 <sup>d</sup>       | 0.042 <sup>g</sup>  | 0.027 <sup>cd</sup>       | 0.046 <sup>g</sup>        | 0.059 <sup>h</sup>  | 0.004 <sup>f</sup>  | 0.031 <sup>f</sup>   |
|       | RSD | 4.622                | 7.712                    | 4.256               | 4.038                     | 4.664                     | 5.308               | 0.558               | 3.864                |
| Mal   | avg | 0.351                | 0.552                    | 0.789               | 1.221                     | 1.527                     | 2.356               | 2.022               | 2.054                |

|      |     |                    |                      |                     |                     |                     |                     |                     |                     |
|------|-----|--------------------|----------------------|---------------------|---------------------|---------------------|---------------------|---------------------|---------------------|
|      | sd  | 0.003 <sup>a</sup> | 0.007 <sup>abc</sup> | 0.009 <sup>bc</sup> | 0.059 <sup>de</sup> | 0.095 <sup>e</sup>  | 0.141 <sup>f</sup>  | 0.185 <sup>f</sup>  | 0.287 <sup>f</sup>  |
|      | RSD | 0.942              | 1.242                | 1.196               | 4.872               | 6.228               | 5.970               | 9.172               | 13.996              |
| MALt | avg | 0.008              | 0.009                | 0.012               | 1.114               | 1.983               | 2.999               | 4.564               | 1.355               |
|      | sd  | 0.000 <sup>a</sup> | 0.000 <sup>a</sup>   | 0.000 <sup>a</sup>  | 0.028 <sup>b</sup>  | 0.007 <sup>c</sup>  | 0.005 <sup>e</sup>  | 0.196 <sup>g</sup>  | 0.024 <sup>b</sup>  |
|      | RSD | 3.570              | 2.370                | 3.264               | 2.506               | 0.354               | 0.178               | 4.284               | 1.766               |
| Mant | avg | 1.631              | 1.896                | 2.014               | 5.632               | 7.662               | 10.233              | 9.525               | 12.455              |
|      | sd  | 0.036 <sup>c</sup> | 0.059 <sup>d</sup>   | 0.043 <sup>d</sup>  | 0.125 <sup>e</sup>  | 0.153 <sup>f</sup>  | 0.016 <sup>h</sup>  | 0.003 <sup>g</sup>  | 0.005 <sup>j</sup>  |
|      | RSD | 2.226              | 3.112                | 2.124               | 2.226               | 1.992               | 0.156               | 0.032               | 0.044               |
| Xyl  | avg | 0.856              | 0.993                | 1.258               | 0.568               | 0.754               | 0.963               | 0.973               | 0.981               |
|      | sd  | 0.000 <sup>c</sup> | 0.011 <sup>ef</sup>  | 0.015 <sup>h</sup>  | 0.008 <sup>a</sup>  | 0.015 <sup>b</sup>  | 0.019 <sup>ef</sup> | 0.038 <sup>ef</sup> | 0.037 <sup>ef</sup> |
|      | RSD | 0.018              | 1.136                | 1.228               | 1.482               | 1.986               | 1.986               | 3.926               | 3.748               |
| Man  | avg | 0.072              | 0.088                | 0.102               | 0.885               | 0.993               | 1.563               | 1.327               | 1.339               |
|      | sd  | 0.004 <sup>a</sup> | 0.004 <sup>a</sup>   | 0.006 <sup>a</sup>  | 0.036 <sup>b</sup>  | 0.056 <sup>c</sup>  | 0.059 <sup>e</sup>  | 0.031 <sup>d</sup>  | 0.029 <sup>d</sup>  |
|      | RSD | 5.178              | 4.226                | 5.570               | 4.024               | 5.652               | 3.774               | 2.332               | 2.166               |
| Pan  | avg | 0.011              | 0.018                | 0.021               | 0.425               | 0.558               | 0.658               | 0.625               | 0.542               |
|      | sd  | 0.000 <sup>a</sup> | 0.001 <sup>a</sup>   | 0.001 <sup>a</sup>  | 0.011 <sup>b</sup>  | 0.016 <sup>cd</sup> | 0.020 <sup>f</sup>  | 0.024 <sup>ef</sup> | 0.022 <sup>c</sup>  |
|      | RSD | 2.663              | 3.826                | 2.562               | 2.511               | 2.845               | 2.998               | 3.829               | 4.056               |
| Ram  | avg | 1.109              | 1.526                | 1.996               | 0.223               | 0.356               | 0.452               | 0.388               | 0.345               |
|      | sd  | 0.017 <sup>f</sup> | 0.032 <sup>i</sup>   | 0.030 <sup>j</sup>  | 0.003 <sup>a</sup>  | 0.005 <sup>b</sup>  | 0.006 <sup>c</sup>  | 0.001 <sup>bc</sup> | 0.002 <sup>b</sup>  |
|      | RSD | 1.559              | 2.119                | 1.527               | 1.183               | 1.376               | 1.282               | 0.298               | 0.721               |
| Raf  | avg | 0.856              | 1.243                | 2.012               | 2.141               | 2.853               | 3.114               | 2.415               | 2.443               |
|      | sd  | 0.031 <sup>a</sup> | 0.025 <sup>c</sup>   | 0.050 <sup>e</sup>  | 0.043 <sup>f</sup>  | 0.043 <sup>h</sup>  | 0.018 <sup>i</sup>  | 0.050 <sup>g</sup>  | 0.053 <sup>g</sup>  |
|      | RSD | 3.663              | 2.012                | 2.498               | 2.002               | 1.496               | 0.578               | 2.056               | 2.166               |
| Sth  | avg | 0.617              | 0.882                | 1.022               | 1.025               | 0.995               | 0.896               | 0.569               | 0.542               |
|      | sd  | 0.013 <sup>d</sup> | 0.025 <sup>f</sup>   | 0.027 <sup>g</sup>  | 0.008 <sup>g</sup>  | 0.007 <sup>g</sup>  | 0.001 <sup>f</sup>  | 0.015 <sup>c</sup>  | 0.020 <sup>c</sup>  |
|      | RSD | 2.163              | 2.845                | 2.611               | 0.762               | 0.661               | 0.057               | 2.668               | 3.663               |

Legend: Mean of three replicates  $\pm$  standard deviation. Different letters in the same row indicate statistically significant difference at  $p < 0.05$ . RSD (relative standard deviation). Abbreviations: IM - Mongolian Chaga, MW 96% EtOH, 50% EtOH, H<sub>2</sub>O - microwave-assisted extraction, VAE 96% EtOH, 50% EtOH, H<sub>2</sub>O - ultrasound-assisted extraction, SWE 200 °C, 120 °C – subcritical water extraction; Sor - sorbitol; Tre - trehalose; Ara - arabinose ; Glu - glucose; Fru - fructose; Sac - saccharose; Tur - turanose; Gly - glycerol; Galk - galactitol; Gal - galactose; Rib - ribose; iMAL - isomaltose; iMALt isomaltotriosea; Mal - maltose; MALt - maltotriose; Mant - mannitol; Xyl - xylose; Man-mannose; Pan - panose; Ram - ramnose; Raf -raffinose; Sth - stachyose.

**Table S2.** Free Sugar and sugar alcohol profile of Serbian *I. obliquus* extracts obtained by different green extraction techniques (g/kg).

| g/kg |     | IS-MW               | IS-MW               | IS-MW               | IS-VAE              | IS-VAE             | IS-VAE             | IS-SWE             | IS-SWE              |
|------|-----|---------------------|---------------------|---------------------|---------------------|--------------------|--------------------|--------------------|---------------------|
|      |     | 96% ETOH            | 50% ETOH            | water               | 96% ETOH            | 50% ETOH           | water              | 200°C              | 120°C               |
| Sor  | avg | 1.213               | 1.425               | 1.632               | 1.698               | 1.783              | 2.012              | 4.897              | 3.304               |
|      | sd  | 0.014 <sup>a</sup>  | 0.039 <sup>b</sup>  | 0.037 <sup>cd</sup> | 0.067 <sup>cd</sup> | 0.081 <sup>d</sup> | 0.086 <sup>e</sup> | 0.048 <sup>i</sup> | 0.043 <sup>h</sup>  |
|      | RSD | 1.164               | 2.704               | 2.294               | 3.970               | 4.536              | 4.298              | 0.972              | 1.304               |
| Tre  | avg | 0.234               | 0.266               | 0.287               | 0.352               | 0.405              | 0.425              | 0.521              | 0.676               |
|      | sd  | 0.005 <sup>a</sup>  | 0.007 <sup>ab</sup> | 0.006 <sup>bc</sup> | 0.011 <sup>d</sup>  | 0.017 <sup>e</sup> | 0.021 <sup>e</sup> | 0.015 <sup>f</sup> | 0.027 <sup>h</sup>  |
|      | RSD | 1.950               | 2.648               | 1.926               | 3.136               | 4.164              | 4.824              | 2.850              | 3.926               |
| Ara  | avg | 0.189               | 0.211               | 0.223               | 0.232               | 0.152              | 0.352              | 1.445              | 1.597               |
|      | sd  | 0.003 <sup>ab</sup> | 0.001 <sup>ab</sup> | 0.001 <sup>ab</sup> | 0.005 <sup>b</sup>  | 0.003 <sup>a</sup> | 0.008 <sup>c</sup> | 0.038 <sup>g</sup> | 0.053 <sup>hi</sup> |
|      | RSD | 1.336               | 0.410               | 0.370               | 1.976               | 1.706              | 2.198              | 2.642              | 3.304               |
| Glu  | avg | 24.356              | 26.985              | 28.632              | 18.962              | 22.245             | 26.358             | 66.308             | 52.131              |

|       |     |                     |                      |                     |                                 |                     |                     |                      |                     |
|-------|-----|---------------------|----------------------|---------------------|---------------------------------|---------------------|---------------------|----------------------|---------------------|
|       | sd  | 0.309 <sup>e</sup>  | 0.467 <sup>f</sup>   | 0.416 <sup>g</sup>  | 0.085 <sup>b</sup>              | 0.233 <sup>cd</sup> | 0.104 <sup>f</sup>  | 0.593 <sup>l</sup>   | 0.586 <sup>i</sup>  |
|       | RSD | 1.270               | 1.730                | 1.452               | 0.448                           | 1.046 <sup>c</sup>  | 0.396               | 1.138                | 0.884               |
| Fru   | avg | 10.233              | 12.356               | 14.653              | 11.325                          | 13.989              | 16.856              | 2.547                | 2.106               |
|       | sd  | 0.340 <sup>e</sup>  | 0.494 <sup>g</sup>   | 0.388 <sup>h</sup>  | 0.450 <sup>f</sup>              | 0.718 <sup>h</sup>  | 0.176 <sup>i</sup>  | 0.057 <sup>a</sup>   | 0.048 <sup>a</sup>  |
|       | RSD | 3.326               | 3.996                | 2.650               | 3.970                           | 5.136               | 1.046               | 2.228                | 2.290               |
| Sac   | avg | 2.456               | 3.114                | 4.325               | 1.041                           | 2.653               | 2.986               | 0.423                | 0.314               |
|       | sd  | 0.051 <sup>c</sup>  | 0.064 <sup>d</sup>   | 0.136 <sup>e</sup>  | 0.023 <sup>b</sup>              | 0.070 <sup>cd</sup> | 0.059 <sup>d</sup>  | 0.036 <sup>a</sup>   | 0.010 <sup>a</sup>  |
|       | RSD | 2.064               | 2.046                | 3.136               | 2.228                           | 2.652               | 1.978               | 2.542                | 3.114               |
| Tur   | avg | 1.124               | 1.325                | 1.563               | 1.087                           | 1.986               | 2.966               | 1.635                | 1.828               |
|       | sd  | 0.014 <sup>ab</sup> | 0.036 <sup>bc</sup>  | 0.062 <sup>cd</sup> | 0.034 <sup>ab</sup>             | 0.071 <sup>e</sup>  | 0.118 <sup>f</sup>  | 0.028 <sup>cd</sup>  | 0.056 <sup>de</sup> |
|       | RSD | 1.216               | 2.747                | 3.956               | 3.132                           | 3.559               | 3.976               | 1.700                | 3.060               |
| Gly   | avg | 2.321               | 2.014                | 2.584               | 1.563                           | 1.996               | 2.147               | 1.229                | 1.239               |
|       | sd  | 0.103 <sup>ef</sup> | 0.107 <sup>de</sup>  | 0.104 <sup>f</sup>  | 0.086 <sup>c</sup>              | 0.130 <sup>d</sup>  | 0.147 <sup>de</sup> | 0.038 <sup>b</sup>   | 0.047 <sup>b</sup>  |
|       | RSD | 4.428               | 5.306                | 4.024               | 5.528                           | 6.534               | 6.845               | 3.087                | 3.830               |
| Galk  | avg | 1.653               | 1.896                | 1.993               | 1.815                           | 1.963               | 2.056               | 1.457                | 1.482               |
|       | sd  | 0.025 <sup>cd</sup> | 0.032 <sup>ef</sup>  | 0.003 <sup>ef</sup> | 0.079 <sup>de</sup>             | 0.078 <sup>ef</sup> | 0.063 <sup>f</sup>  | 0.063 <sup>b</sup>   | 0.102 <sup>bc</sup> |
|       | RSD | 1.494               | 1.688                | 0.143               | 4.340                           | 3.978               | 3.087               | 4.332                | 6.895               |
| Gal   | avg | 4.325               | 3.586                | 4.856               | 2.325                           | 3.856               | 4.658               | 3.554                | 4.660               |
|       | sd  | 0.261 <sup>gh</sup> | 0.241 <sup>ef</sup>  | 0.291 <sup>h</sup>  | 0.080 <sup>c</sup>              | 0.172 <sup>fg</sup> | 0.153 <sup>h</sup>  | 0.093 <sup>ef</sup>  | 0.073 <sup>h</sup>  |
|       | RSD | 6.042               | 6.730                | 5.996               | 3.452                           | 4.456               | 3.288               | 2.612                | 1.556               |
| Rib   | avg | 0.986               | 1.124                | 1.365               | 1.312                           | 2.523               | 3.411               | 1.282                | 1.459               |
|       | sd  | 0.031 <sup>bc</sup> | 0.037 <sup>cde</sup> | 0.073 <sup>ef</sup> | 0.061 <sup>d<sup>ef</sup></sup> | 0.163 <sup>h</sup>  | 0.122 <sup>l</sup>  | 0.077 <sup>def</sup> | 0.077 <sup>f</sup>  |
|       | RSD | 3.124               | 3.326                | 5.332               | 4.644                           | 6.446               | 3.584               | 5.996                | 5.306               |
| iMAL  | avg | 0.008               | 0.007                | 1.241               | 0.495                           | 0.459               | 0.663               | 1.412                | 1.580               |
|       | sd  | 0.000 <sup>a</sup>  | 0.000 <sup>a</sup>   | 0.059 <sup>g</sup>  | 0.020 <sup>c</sup>              | 0.030 <sup>c</sup>  | 0.036 <sup>d</sup>  | 0.030 <sup>h</sup>   | 0.030 <sup>i</sup>  |
|       | RSD | 3.963               | 4.726                | 4.730               | 4.112                           | 6.506               | 5.370               | 2.156                | 1.896               |
| iMALT | avg | 0.009               | 0.010                | 0.015               | 0.563                           | 0.689               | 0.852               | 0.786                | 0.774               |
|       | sd  | 0.000 <sup>a</sup>  | 0.000 <sup>a</sup>   | 0.000 <sup>a</sup>  | 0.001 <sup>b</sup>              | 0.004 <sup>de</sup> | 0.002 <sup>f</sup>  | 0.004 <sup>f</sup>   | 0.009 <sup>ef</sup> |
|       | RSD | 0.378               | 1.812                | 1.136               | 0.224                           | 0.536               | 0.242               | 0.482                | 1.108               |
| Mal   | avg | 1.245               | 1.235                | 1.523               | 0.293                           | 0.452               | 0.896               | 2.005                | 1.998               |
|       | sd  | 0.031 <sup>de</sup> | 0.038 <sup>de</sup>  | 0.034 <sup>e</sup>  | 0.015 <sup>a</sup>              | 0.031 <sup>ab</sup> | 0.066 <sup>cd</sup> | 0.187 <sup>f</sup>   | 0.240 <sup>f</sup>  |
|       | RSD | 2.470               | 3.084                | 2.228               | 5.102                           | 6.830               | 7.316               | 9.306                | 11.992              |
| MALt  | avg | 0.005               | 0.007                | 0.011               | 0.008                           | 0.009               | 0.009               | 3.554                | 2.638               |
|       | sd  | 0.000 <sup>a</sup>  | 0.000 <sup>a</sup>   | 0.000 <sup>a</sup>  | 0.000 <sup>a</sup>              | 0.000 <sup>a</sup>  | 0.000 <sup>a</sup>  | 0.182 <sup>f</sup>   | 0.172 <sup>d</sup>  |
|       | RSD | 2.650               | 1.556                | 1.272               | 3.970                           | 3.242               | 3.624               | 5.126                | 6.512               |
| Mant  | avg | 0.896               | 0.925                | 0.986               | 0.852                           | 0.963               | 1.042               | 11.539               | 10.332              |
|       | sd  | 0.020 <sup>ab</sup> | 0.023 <sup>ab</sup>  | 0.021 <sup>ab</sup> | 0.005 <sup>a</sup>              | 0.009 <sup>ab</sup> | 0.006 <sup>b</sup>  | 0.023 <sup>i</sup>   | 0.018 <sup>h</sup>  |
|       | RSD | 2.224               | 2.516                | 2.170               | 0.616                           | 0.904               | 0.596               | 0.202                | 0.178               |
| Xyl   | avg | 1.023               | 1.234                | 1.425               | 0.885                           | 0.996               | 1.147               | 0.942                | 0.947               |
|       | sd  | 0.002 <sup>f</sup>  | 0.002 <sup>h</sup>   | 0.047 <sup>i</sup>  | 0.001 <sup>cd</sup>             | 0.001 <sup>ef</sup> | 0.000 <sup>g</sup>  | 0.025 <sup>de</sup>  | 0.031 <sup>de</sup> |
|       | RSD | 0.178               | 0.136                | 3.316               | 0.084                           | 0.112               | 0.024               | 2.664                | 3.306               |
| Man   | avg | 0.031               | 0.042                | 0.058               | 0.029                           | 0.041               | 0.063               | 1.323                | 1.312               |
|       | sd  | 0.001 <sup>a</sup>  | 0.002 <sup>a</sup>   | 0.003 <sup>a</sup>  | 0.001 <sup>a</sup>              | 0.002 <sup>a</sup>  | 0.002 <sup>a</sup>  | 0.039 <sup>d</sup>   | 0.028 <sup>d</sup>  |
|       | RSD | 2.066               | 3.970                | 5.578               | 4.130                           | 4.642               | 3.792               | 2.985                | 2.145               |
| Pan   | avg | 0.010               | 0.012                | 0.018               | 0.008                           | 0.012               | 0.015               | 0.563                | 0.589               |
|       | sd  | 0.000 <sup>a</sup>  | 0.000 <sup>a</sup>   | 0.000 <sup>a</sup>  | 0.000 <sup>a</sup>              | 0.001 <sup>a</sup>  | 0.000 <sup>a</sup>  | 0.021 <sup>cd</sup>  | 0.025 <sup>de</sup> |
|       | RSD | 1.206               | 2.058                | 1.761               | 3.163                           | 4.478               | 2.011               | 3.706                | 4.318               |
| Ram   | avg | 1.025               | 1.235                | 1.412               | 0.856                           | 0.963               | 1.023               | 0.325                | 0.355               |
|       | sd  | 0.036 <sup>ef</sup> | 0.053 <sup>g</sup>   | 0.064 <sup>h</sup>  | 0.023 <sup>d</sup>              | 0.035 <sup>e</sup>  | 0.027 <sup>ef</sup> | 0.001 <sup>b</sup>   | 0.001 <sup>b</sup>  |

|     |     |                    |                    |                    |                    |                    |                    |                    |                    |
|-----|-----|--------------------|--------------------|--------------------|--------------------|--------------------|--------------------|--------------------|--------------------|
|     | RSD | 2.721              | 3.662              | 2.616              | 3.518              | 4.332              | 4.507              | 0.316              | 0.376              |
| Raf | avg | 1.325              | 1.452              | 1.568              | 0.752              | 0.863              | 0.996              | 2.426              | 2.410              |
|     | sd  | 0.022 <sup>c</sup> | 0.014 <sup>d</sup> | 0.012 <sup>d</sup> | 0.006 <sup>a</sup> | 0.006 <sup>a</sup> | 0.036 <sup>b</sup> | 0.053 <sup>g</sup> | 0.081 <sup>g</sup> |
|     | RSD | 1.663              | 0.948              | 0.776              | 0.762              | 0.666              | 3.613              | 2.166              | 3.350              |
| Sth | avg | 0.563              | 0.633              | 0.741              | 0.114              | 0.358              | 0.552              | 0.556              | 0.561              |
|     | sd  | 0.007 <sup>c</sup> | 0.012 <sup>d</sup> | 0.007 <sup>e</sup> | 0.003 <sup>a</sup> | 0.015 <sup>b</sup> | 0.011 <sup>c</sup> | 0.000 <sup>c</sup> | 0.000 <sup>c</sup> |
|     | RSD | 1.163              | 1.948              | 1.006              | 2.329              | 4.316              | 1.948              | 0.089              | 0.062              |

Legend: Mean of three replicates  $\pm$  standard deviation. Different letters in the same row indicate statistically significant difference at  $p < 0.05$ . RSD (relative standard deviation). Abbreviations: IM - Mongolian Chaga, MW 96% EtOH, 50% EtOH, H<sub>2</sub>O - microwave-assisted extraction, VAE 96% EtOH, 50% EtOH, H<sub>2</sub>O - ultrasound-assisted extraction, SWE 200 °C, 120 °C – subcritical water extraction; Sor - Sorbitol; Tre - trehalose; Ara - arabinose ; Glu - glucose; Fru - fructose; Sac - saccharose; Tur - turanose; Gly - Glycerol; Galk - galactitol; Gal - galactose; Rib - ribose; iMAL - isomaltose; iMALt isomaltotriosea; Mal - maltose; MALt - maltotriose; Mant - mannitol; Xyl - xylose; Man-mannose; Pan - panose; Ram - ramnose; Raf -raffinose; Sth - stachyose.

**Table S3.** Polyphenol profile of Serbian *I. obliquus* extracts obtained by different green extraction techniques (mg/kg).

| mg/kg                                |     | IS-MW<br>96%<br>ETOH | IS-MW<br>50%<br>ETOH | IS-<br>MW<br>water | IS-<br>VAE<br>96%<br>ETOH | IS-<br>VAE<br>50%<br>ETO<br>H | IS-<br>VAE<br>water | IS-<br>SWE<br>200°C | IS-<br>SWE<br>120°C |
|--------------------------------------|-----|----------------------|----------------------|--------------------|---------------------------|-------------------------------|---------------------|---------------------|---------------------|
| Protocate-<br>chuic_acid             | avg | 0.99                 | 0.97                 | 0.83               | 1.24                      | 1.31                          | 0.98                | 0.99                | 1.49                |
|                                      | sd  | 0.01 <sup>d</sup>    | 0.01 <sup>d</sup>    | 0.01 <sup>b</sup>  | 0.01 <sup>f</sup>         | 0.02 <sup>g</sup>             | 0.01 <sup>d</sup>   | 0.00 <sup>d</sup>   | 0.00 <sup>h</sup>   |
|                                      | RSD | 1.00                 | 0.89                 | 1.11               | 1.04                      | 1.33                          | 1.21                | 1.16                | 1.43                |
| Chlorogenic<br>acid                  | avg | 812.32               | 897.32               | 741.27             | 795.32                    | 845.36                        | 658.63              | 840.35              | 697.42              |
|                                      | sd  | 0.12 <sup>h</sup>    | 0.16 <sup>i</sup>    | 0.21 <sup>d</sup>  | 0.16 <sup>f</sup>         | 0.20 <sup>k</sup>             | 0.22 <sup>b</sup>   | 1.09 <sup>j</sup>   | 0.93 <sup>c</sup>   |
|                                      | RSD | 0.95                 | 1.45                 | 1.55               | 1.24                      | 1.69                          | 1.46                | 9.12                | 6.5                 |
| p-Hydroxyben-<br>zoic acid           | avg | 0.33                 | 0.38                 | 0.15               | 0.51                      | 0.47                          | 0.39                | 0.23                | 0.55                |
|                                      | sd  | 0.00 <sup>f</sup>    | 0.00 <sup>g</sup>    | 0.00 <sup>a</sup>  | 0.00 <sup>j</sup>         | 0.00 <sup>i</sup>             | 0.00 <sup>gh</sup>  | 0.01 <sup>c</sup>   | 0.01 <sup>k</sup>   |
|                                      | RSD | 0.13                 | 0.04                 | 0.04               | 0.11                      | 0.14                          | 0.31                | 1.65                | 1.03                |
| Catechin                             | avg | 2.80                 | 2.99                 | 2.94               | 3.49                      | 3.39                          | 2.99                | 1.80                | 2.41                |
|                                      | sd  | 0.02 <sup>d</sup>    | 0.03 <sup>b</sup>    | 0.08 <sup>d</sup>  | 0.04 <sup>e</sup>         | 0.07 <sup>e</sup>             | 0.03 <sup>d</sup>   | 0.05 <sup>b</sup>   | 0.10 <sup>c</sup>   |
|                                      | RSD | 0.88                 | 1.42                 | 2.82               | 1.11                      | 1.99                          | 1.02                | 2.86                | 4.01                |
| p-Hydroxy-<br>phenyla-<br>cetic_acid | avg | 0.11                 | 0.14                 | 0.15               | 0.15                      | 0.13                          | 0.11                | 0.11                | 0.12                |
|                                      | sd  | 0.00                 | 0.00                 | 0.00               | 0.00                      | 0.00                          | 0.00                | 0.00                | 0.00                |
|                                      | RSD | 0.70                 | 0.40                 | 0.43               | 0.87                      | 0.91                          | 0.63                | 0.66                | 0.92                |
| Caffeic acid                         | avg | 0.84                 | 0.85                 | 0.78               | 0.94                      | 0.88                          | 0.76                | 0.98                | 2.66                |
|                                      | sd  | 0.02 <sup>ab</sup>   | 0.03 <sup>ab</sup>   | 0.06 <sup>a</sup>  | 0.04 <sup>abc</sup>       | 0.04 <sup>ab</sup>            | 0.03 <sup>a</sup>   | 0.04 <sup>bc</sup>  | 0.14 <sup>f</sup>   |
|                                      | RSD | 2.05                 | 3.99                 | 2.86               | 3.73                      | 4.91                          | 4.02                | 4.08                | 5.36                |
| Vanillic acid                        | avg | 0.27                 | 0.29                 | 0.42               | 0.27                      | 0.29                          | 0.24                | 0.27                | 0.44                |
|                                      | sd  | 0.00 <sup>c</sup>    | 0.00 <sup>e</sup>    | 0.00 <sup>i</sup>  | 0.00 <sup>c</sup>         | 0.00 <sup>e</sup>             | 0.01 <sup>a</sup>   | 0.00 <sup>c</sup>   | 0.00 <sup>i</sup>   |
|                                      | RSD | 0.16                 | 0.23                 | 0.15               | 1.27                      | 1.75                          | 2.28                | 0.31                | 0.39                |
| Syringic acid                        | avg | 0.12                 | 0.14                 | 0.23               | 0.52                      | 0.52                          | 0.50                | 0.13                | 0.11                |
|                                      | sd  | 0.00 <sup>bc</sup>   | 0.00 <sup>d</sup>    | 0.00 <sup>e</sup>  | 0.00 <sup>k</sup>         | 0.00 <sup>k</sup>             | 0.00 <sup>i</sup>   | 0.00 <sup>cd</sup>  | 0.00 <sup>b</sup>   |
|                                      | RSD | 0.47                 | 0.13                 | 0.11               | 0.37                      | 0.25                          | 0.61                | 3.79                | 2.82                |
| Rutin                                | avg | 0.10                 | 0.10                 | 0.08               | 0.08                      | 0.09                          | 0.08                | 0.09                | 0.07                |
|                                      | sd  | 0.00 <sup>d</sup>    | 0.00 <sup>d</sup>    | 0.00 <sup>b</sup>  | 0.00 <sup>f</sup>         | 0.01 <sup>c</sup>             | 0.00 <sup>b</sup>   | 0.00 <sup>c</sup>   | 0.00 <sup>a</sup>   |
|                                      | RSD | 1.05                 | 1.37                 | 0.97               | 1.55                      | 2.06                          | 1.48                | 4.11                | 5.02                |
|                                      | avg | 0.41                 | 0.45                 | 0.59               | 0.24                      | 0.28                          | 0.23                | 1.35                | 1.22                |

|                             |     |                    |                    |                     |                    |                    |                    |                    |                    |
|-----------------------------|-----|--------------------|--------------------|---------------------|--------------------|--------------------|--------------------|--------------------|--------------------|
| Quercetin 3-O-glucoside     | sd  | 0.01 <sup>d</sup>  | 0.00 <sup>e</sup>  | 0.01 <sup>g</sup>   | 0.01 <sup>a</sup>  | 0.01 <sup>b</sup>  | 0.01 <sup>a</sup>  | 0.00 <sup>i</sup>  | 0.01 <sup>h</sup>  |
|                             | RSD | 1.38               | 1.10               | 0.54                | 2.23               | 3.31               | 3.56               | 0.46               | 0.89               |
| p-Coumaric_acid             | avg | 1.42               | 1.59               | 1.10                | 1.46               | 1.41               | 1.40               | 1.55               | 3.07               |
|                             | sd  | 0.02 <sup>f</sup>  | 0.04 <sup>gh</sup> | 0.02 <sup>c</sup>   | 0.00 <sup>f</sup>  | 0.00 <sup>f</sup>  | 0.00 <sup>ef</sup> | 0.01 <sup>g</sup>  | 0.04 <sup>i</sup>  |
|                             | RSD | 1.49               | 2.31               | 2.02                | 0.65               | 1.05               | 0.37               | 0.86               | 1.20               |
| Isorhamnetin_3-O-rutinoside | avg | 0.12               | 0.13               | 0.13                | 1.12               | 1.06               | 0.98               | 0.11               | 0.11               |
|                             | sd  | 0.00 <sup>a</sup>  | 0.00 <sup>a</sup>  | 0.00 <sup>a</sup>   | 0.01 <sup>i</sup>  | 0.01 <sup>h</sup>  | 0.02 <sup>f</sup>  | 0.00 <sup>a</sup>  | 0.00 <sup>a</sup>  |
|                             | RSD | 2.43               | 3.26               | 2.24                | 0.82               | 1.02               | 1.60               | 1.00               | 1.38               |
| Sinapic_acid                | avg | 0.10               | 0.10               | 0.11                | 0.10               | 0.11               | 0.10               | 0.11               | 0.12               |
|                             | sd  | 0.00 <sup>a</sup>  | 0.00 <sup>a</sup>  | 0.00 <sup>ab</sup>  | 0.00 <sup>a</sup>  | 0.00 <sup>ab</sup> | 0.00 <sup>ab</sup> | 0.00 <sup>ab</sup> | 0.00 <sup>b</sup>  |
|                             | RSD | 0.52               | 1.27               | 1.24                | 1.19               | 0.85               | 0.82               | 1.97               | 1.14               |
| Ferulic_acid                | avg | 0.26               | 0.27               | 0.63                | 0.23               | 0.29               | 0.28               | 0.29               | 0.47               |
|                             | sd  | 0.01 <sup>cd</sup> | 0.01 <sup>d</sup>  | 0.02 <sup>h</sup>   | 0.00 <sup>bc</sup> | 0.00 <sup>d</sup>  | 0.00 <sup>d</sup>  | 0.01 <sup>d</sup>  | 0.01 <sup>g</sup>  |
|                             | RSD | 3.51               | 4.45               | 3.36                | 0.98               | 1.58               | 0.85               | 3.21               | 2.55               |
| Cinnamic acid               | avg | 4.33               | 4.56               | 5.69                | 2.65               | 4.52               | 1.87               | 4.33               | 8.94               |
|                             | sd  | 0.13 <sup>c</sup>  | 0.15 <sup>cd</sup> | 0.23 <sup>efg</sup> | 0.02 <sup>b</sup>  | 0.08 <sup>cd</sup> | 0.06 <sup>a</sup>  | 0.24 <sup>c</sup>  | 0.74 <sup>i</sup>  |
|                             | RSD | 2.97               | 3.22               | 3.99                | 0.64               | 1.85               | 3.23               | 5.62               | 8.24               |
| Quercetin 3-O-rhamnoside    | avg | 0.33               | 0.33               | 0.14                | 0.09               | 0.09               | 0.08               | 4.47               | 4.06               |
|                             | sd  | 0.01 <sup>ab</sup> | 0.05 <sup>ab</sup> | 0.01 <sup>ab</sup>  | 0.00 <sup>a</sup>  | 0.00 <sup>a</sup>  | 0.00 <sup>a</sup>  | 0.22 <sup>f</sup>  | 0.26 <sup>e</sup>  |
|                             | RSD | 0.52               | 2.12               | 0.97                | 1.17               | 2.15               | 1.86               | 5.02               | 6.32               |
| Kaempferol_7-O-glucoside    | avg | 0.06               | 0.08               | 0.06                | 0.04               | 0.05               | 0.04               | 1.53               | 1.49               |
|                             | sd  | 0.05 <sup>a</sup>  | 0.07 <sup>a</sup>  | 0.00 <sup>a</sup>   | 0.00 <sup>a</sup>  | 0.00 <sup>a</sup>  | 0.00 <sup>a</sup>  | 0.05 <sup>c</sup>  | 0.06 <sup>c</sup>  |
|                             | RSD | 2.90               | 3.78               | 2.77                | 3.53               | 4.11               | 5.05               | 3.21               | 5.26               |
| Phlorizin                   | avg | 0.83               | 0.87               | 0.54                | 0.40               | 0.44               | 0.39               | 0.78               | 0.36               |
|                             | sd  | 0.02 <sup>cd</sup> | 0.00 <sup>d</sup>  | 0.00 <sup>b</sup>   | 0.01 <sup>a</sup>  | 0.01 <sup>a</sup>  | 0.00 <sup>a</sup>  | 0.02 <sup>c</sup>  | 0.01 <sup>a</sup>  |
|                             | RSD | 2.00               | 0.30               | 0.27                | 1.58               | 1.33               | 1.26               | 2.69               | 1.77               |
| Eriodictyol                 | avg | 0.06               | 0.06               | 0.03                | 0.23               | 0.21               | 0.20               | 0.03               | 0.05               |
|                             | sd  | 0.00 <sup>b</sup>  | 0.00 <sup>b</sup>  | 0.00 <sup>a</sup>   | 0.01 <sup>d</sup>  | 0.01 <sup>c</sup>  | 0.00 <sup>c</sup>  | 0.00 <sup>a</sup>  | 0.00 <sup>b</sup>  |
|                             | RSD | 3.25               | 3.90               | 3.09                | 2.46               | 4.66               | 2.02               | 0.65               | 1.03               |
| Quercetin                   | avg | 1.45               | 1.65               | 1.75                | 1.25               | 1.46               | 1.10               | 0.34               | 0.49               |
|                             | sd  | 0.02 <sup>de</sup> | 0.04 <sup>ef</sup> | 0.03 <sup>ef</sup>  | 0.04 <sup>cd</sup> | 0.02 <sup>de</sup> | 0.03 <sup>c</sup>  | 0.04 <sup>a</sup>  | 0.05 <sup>ab</sup> |
|                             | RSD | 1.12               | 2.63               | 4.33                | 3.26               | 1.33               | 2.65               | 1.95               | 2.35               |
| Phloretin                   | avg | 0.02               | 0.04               | 0.03                | 0.06               | 0.07               | 0.05               | 0.02               | 0.04               |
|                             | sd  | 0.00               | 0.00               | 0.00                | 0.00               | 0.00               | 0.00               | 0.00               | 0.00               |
|                             | RSD | 4.93               | 4.78               | 2.58                | 2.29               | 2.55               | 1.35               | 0.58               | 0.68               |
| Naringenin                  | avg | 0.02               | 0.03               | 0.02                | 0.03               | 0.04               | 0.03               | 0.02               | 0.02               |
|                             | sd  | 0.00               | 0.00               | 0.00                | 0.00               | 0.00               | 0.00               | 0.00               | 0.00               |
|                             | RSD | 1.01               | 1.24               | 0.95                | 0.76               | 0.90               | 0.94               | 0.45               | 0.50               |
| Gallic_acid                 | avg | 1.26               | 1.57               | 1.00                | 2.15               | 2.56               | 1.87               | 0.42               | 0.13               |
|                             | sd  | 0.01 <sup>f</sup>  | 0.01 <sup>h</sup>  | 0.00 <sup>d</sup>   | 0.01 <sup>k</sup>  | 0.01 <sup>m</sup>  | 0.01 <sup>i</sup>  | 0.01 <sup>c</sup>  | 0.01 <sup>a</sup>  |
|                             | RSD | 0.44               | 0.35               | 0.33                | 0.47               | 0.45               | 0.62               | 0.44               | 0.46               |

Legend: The results are expressed as mean values of three replicates  $\pm$  standard deviation. Different letters in the same row indicate statistically significant difference at  $p < 0.05$ . Abbreviations: IS - Serbian Chaga, MW 96% EtOH, 50% EtOH, H<sub>2</sub>O - microwave-assisted extraction, VAE 96% EtOH, 50% EtOH, H<sub>2</sub>O - ultrasound-assisted extraction, SWE 200 °C, 120 °C.

**Table S4.** Polyphenol profile of Mongolian *I. obliquus* extracts obtained by different green extraction techniques (mg/kg).

| mg/kg                           |     | IM-MW<br>96%<br>ETOH | IM-<br>MW<br>50%<br>ETOH | IM-<br>MW<br>water | IM-<br>VAE<br>96%<br>ETOH | IM-<br>VAE<br>50%<br>ETOH | IM-<br>VAE<br>water | IM-<br>SWE<br>200°C | IM-<br>SWE<br>120°C |
|---------------------------------|-----|----------------------|--------------------------|--------------------|---------------------------|---------------------------|---------------------|---------------------|---------------------|
| Protocatechuic acid             | avg | 1.03                 | 1.26                     | 0.97               | 0.85                      | 0.91                      | 0.79                | 0.83                | 1.25                |
|                                 | sd  | 0.00 <sup>e</sup>    | 0.00 <sup>f</sup>        | 0.00 <sup>d</sup>  | 0.00 <sup>b</sup>         | 0.00 <sup>c</sup>         | 0.00 <sup>a</sup>   | 0.00 <sup>b</sup>   | 0.00 <sup>f</sup>   |
|                                 | RSD | 0.09                 | 0.24                     | 0.30               | 0.18                      | 0.23                      | 0.21                | 0.21                | 0.36                |
| Chlorogenic acid                | avg | 825.32               | 798.63                   | 897.32             | 742.63                    | 768.96                    | 642.12              | 741.27              | 970.56              |
|                                 | sd  | 0.24 <sup>i</sup>    | 0.32 <sup>g</sup>        | 0.21 <sup>l</sup>  | 0.63 <sup>d</sup>         | 0.73 <sup>e</sup>         | 1.28 <sup>a</sup>   | 1.23 <sup>d</sup>   | 0.89 <sup>m</sup>   |
|                                 | RSD | 1.95                 | 2.56                     | 1.9                | 4.64                      | 5.58                      | 8.21                | 9.14                | 8.66                |
| p-Hydroxybenzoic acid           | avg | 0.30                 | 0.32                     | 0.28               | 0.38                      | 0.41                      | 0.29                | 0.15                | 0.20                |
|                                 | sd  | 0.00 <sup>de</sup>   | 0.00 <sup>ef</sup>       | 0.01 <sup>d</sup>  | 0.00 <sup>g</sup>         | 0.02 <sup>h</sup>         | 0.01 <sup>d</sup>   | 0.00 <sup>a</sup>   | 0.00 <sup>b</sup>   |
|                                 | RSD | 0.33                 | 1.14                     | 1.82               | 1.24                      | 4.65                      | 2.78                | 0.98                | 1.13                |
| Catechin                        | avg | 5.99                 | 5.24                     | 4.99               | 5.76                      | 6.10                      | 4.33                | 2.94                | 1.51                |
|                                 | sd  | 0.06 <sup>hi</sup>   | 0.07 <sup>g</sup>        | 0.04 <sup>g</sup>  | 0.15 <sup>h</sup>         | 0.12 <sup>i</sup>         | 0.20 <sup>f</sup>   | 0.07 <sup>d</sup>   | 0.05 <sup>a</sup>   |
|                                 | RSD | 1.00                 | 1.26                     | 0.90               | 2.65                      | 2.01                      | 4.59                | 2.22                | 3.25                |
| p-Hydroxy-phenylacetic acid     | avg | 0.15                 | 0.18                     | 0.14               | 0.13                      | 0.14                      | 0.11                | 0.15                | 0.07                |
|                                 | sd  | 0.00                 | 0.00                     | 0.00               | 0.00                      | 0.00                      | 0.00                | 0.00                | 0.00                |
|                                 | RSD | 0.68                 | 1.26                     | 2.01               | 1.39                      | 2.37                      | 3.11                | 0.80                | 0.82                |
| Caffeic acid                    | avg | 4.01                 | 4.26                     | 3.97               | 2.05                      | 2.53                      | 1.86                | 2.24                | 1.13                |
|                                 | sd  | 0.03 <sup>g</sup>    | 0.16 <sup>h</sup>        | 0.09 <sup>g</sup>  | 0.01 <sup>de</sup>        | 0.02 <sup>f</sup>         | 0.02 <sup>d</sup>   | 0.09 <sup>e</sup>   | 0.01 <sup>c</sup>   |
|                                 | RSD | 0.71                 | 3.77                     | 2.23               | 0.49                      | 0.92                      | 1.26                | 4.10                | 1.33                |
| Vanillic acid                   | avg | 0.33                 | 0.36                     | 0.28               | 0.25                      | 0.29                      | 0.24                | 0.42                | 0.38                |
|                                 | sd  | 0.00 <sup>f</sup>    | 0.00 <sup>g</sup>        | 0.00 <sup>d</sup>  | 0.00 <sup>b</sup>         | 0.00 <sup>e</sup>         | 0.00 <sup>a</sup>   | 0.00 <sup>i</sup>   | 0.00 <sup>h</sup>   |
|                                 | RSD | 0.38                 | 0.47                     | 0.35               | 1.02                      | 1.71                      | 1.35                | 0.28                | 0.53                |
| Syringic acid                   | avg | 0.39                 | 0.41                     | 0.31               | 0.36                      | 0.41                      | 0.30                | 0.23                | 0.04                |
|                                 | sd  | 0.00 <sup>h</sup>    | 0.00 <sup>i</sup>        | 0.00 <sup>f</sup>  | 0.00 <sup>g</sup>         | 0.01 <sup>i</sup>         | 0.01 <sup>f</sup>   | 0.01 <sup>e</sup>   | 0.00 <sup>a</sup>   |
|                                 | RSD | 0.62                 | 0.58                     | 0.61               | 0.58                      | 2.25                      | 1.99                | 2.85                | 3.97                |
| Rutin                           | avg | 0.35                 | 0.46                     | 0.30               | 0.30                      | 0.36                      | 0.28                | 0.28                | 0.24                |
|                                 | sd  | 0.00 <sup>h</sup>    | 0.00 <sup>j</sup>        | 0.00 <sup>g</sup>  | 0.00 <sup>g</sup>         | 0.00 <sup>i</sup>         | 0.01 <sup>f</sup>   | 0.00 <sup>f</sup>   | 0.00 <sup>e</sup>   |
|                                 | RSD | 0.16                 | 0.21                     | 0.18               | 1.11                      | 1.00                      | 3.13                | 4.12                | 3.24                |
| Quercetin 3-O-glu-<br>coside    | avg | 0.46                 | 0.53                     | 0.34               | 0.29                      | 0.31                      | 0.24                | 1.59                | 1.42                |
|                                 | sd  | 0.02 <sup>e</sup>    | 0.01 <sup>f</sup>        | 0.01 <sup>c</sup>  | 0.01 <sup>b</sup>         | 0.01 <sup>bc</sup>        | 0.01 <sup>a</sup>   | 0.01 <sup>j</sup>   | 0.01 <sup>i</sup>   |
|                                 | RSD | 3.33                 | 2.46                     | 2.90               | 3.11                      | 4.03                      | 3.58                | 0.77                | 0.76                |
| p-Coumaric acid                 | avg | 1.24                 | 1.66                     | 0.99               | 1.43                      | 1.56                      | 1.33                | 1.10                | 0.85                |
|                                 | sd  | 0.03 <sup>d</sup>    | 0.05 <sup>h</sup>        | 0.01 <sup>b</sup>  | 0.02 <sup>f</sup>         | 0.03 <sup>g</sup>         | 0.03 <sup>e</sup>   | 0.01 <sup>c</sup>   | 0.01 <sup>a</sup>   |
|                                 | RSD | 2.28                 | 3.12                     | 1.51               | 1.75                      | 2.11                      | 2.47                | 0.82                | 1.31                |
| Isorhamnetin 3-O-<br>rutinoside | avg | 1.01                 | 1.36                     | 0.89               | 0.39                      | 0.43                      | 0.29                | 0.13                | 0.12                |
|                                 | sd  | 0.00 <sup>g</sup>    | 0.00 <sup>j</sup>        | 0.00 <sup>e</sup>  | 0.01 <sup>c</sup>         | 0.01 <sup>d</sup>         | 0.01 <sup>b</sup>   | 0.00 <sup>a</sup>   | 0.00 <sup>a</sup>   |
|                                 | RSD | 0.23                 | 0.28                     | 0.22               | 2.65                      | 3.32                      | 2.85                | 0.89                | 1.79                |
| Sinapic acid                    | avg | 0.43                 | 0.65                     | 0.16               | 0.25                      | 0.36                      | 0.20                | 0.27                | 0.26                |
|                                 | sd  | 0.01 <sup>h</sup>    | 0.01 <sup>i</sup>        | 0.01 <sup>de</sup> | 0.00 <sup>d</sup>         | 0.01 <sup>f</sup>         | 0.00 <sup>c</sup>   | 0.00 <sup>e</sup>   | 0.00 <sup>de</sup>  |
|                                 | RSD | 0.73                 | 0.72                     | 0.81               | 0.77                      | 3.16                      | 1.79                | 0.90                | 1.32                |
| Ferulic acid                    | avg | 0.43                 | 0.67                     | 0.23               | 0.21                      | 0.35                      | 0.19                | 0.63                | 0.64                |
|                                 | sd  | 0.01 <sup>f</sup>    | 0.02 <sup>i</sup>        | 0.01 <sup>bc</sup> | 0.01 <sup>ab</sup>        | 0.02 <sup>e</sup>         | 0.00 <sup>a</sup>   | 0.02 <sup>h</sup>   | 0.02 <sup>h</sup>   |
|                                 | RSD | 2.25                 | 3.38                     | 2.85               | 6.52                      | 5.79                      | 1.33                | 3.14                | 3.85                |
| Cinnamic acid                   | avg | 5.21                 | 5.66                     | 4.21               | 6.33                      | 7.00                      | 5.87                | 5.69                | 6.43                |
|                                 | sd  | 0.12 <sup>de</sup>   | 0.22 <sup>ef</sup>       | 0.17 <sup>c</sup>  | 0.18 <sup>gh</sup>        | 0.07 <sup>h</sup>         | 0.11 <sup>efg</sup> | 0.34 <sup>efg</sup> | 0.09 <sup>gh</sup>  |
|                                 | RSD | 2.24                 | 3.86                     | 4.11               | 2.89                      | 1.05                      | 1.89                | 5.99                | 1.33                |

|                          |     |                    |                   |                    |                    |                    |                    |                   |                    |
|--------------------------|-----|--------------------|-------------------|--------------------|--------------------|--------------------|--------------------|-------------------|--------------------|
| Quercetin 3-O-rhamnoside | avg | 0.31               | 0.36              | 0.20               | 0.08               | 0.08               | 0.07               | 1.14              | 1.88               |
|                          | sd  | 0.01 <sup>ab</sup> | 0.01 <sup>b</sup> | 0.00 <sup>ab</sup> | 0.00 <sup>a</sup>  | 0.00 <sup>a</sup>  | 0.00 <sup>a</sup>  | 0.05 <sup>c</sup> | 0.06 <sup>d</sup>  |
|                          | RSD | 1.87               | 2.99              | 1.75               | 2.00               | 2.69               | 3.05               | 4.77              | 3.00               |
| Kaempferol_7-O-glucoside | avg | 0.09               | 0.11              | 0.04               | 0.01               | 0.02               | 0.01               | 1.33              | 1.51               |
|                          | sd  | 0.00 <sup>a</sup>  | 0.00 <sup>a</sup> | 0.00 <sup>a</sup>  | 0.00 <sup>a</sup>  | 0.00 <sup>a</sup>  | 0.00 <sup>a</sup>  | 0.04 <sup>b</sup> | 0.13 <sup>c</sup>  |
|                          | RSD | 1.79               | 2.37              | 1.63               | 3.12               | 4.33               | 3.90               | 3.00              | 8.45               |
| Phlorizin                | avg | 1.64               | 1.76              | 1.43               | 1.40               | 1.46               | 1.30               | 1.54              | 1.22               |
|                          | sd  | 0.02 <sup>h</sup>  | 0.07 <sup>i</sup> | 0.07 <sup>f</sup>  | 0.02 <sup>f</sup>  | 0.01 <sup>fg</sup> | 0.00 <sup>e</sup>  | 0.02 <sup>g</sup> | 0.00 <sup>e</sup>  |
|                          | RSD | 1.22               | 3.99              | 5.25               | 4.25               | 1.52               | 0.85               | 1.21              | 1.57               |
| Eriodictyol              | avg | 0.49               | 0.52              | 0.41               | 0.05               | 0.05               | 0.05               | 0.75              | 0.65               |
|                          | sd  | 0.01 <sup>f</sup>  | 0.01 <sup>g</sup> | 0.00 <sup>e</sup>  | 0.00 <sup>b</sup>  | 0.00 <sup>b</sup>  | 0.00 <sup>b</sup>  | 0.00 <sup>i</sup> | 0.00 <sup>h</sup>  |
|                          | RSD | 1.33               | 1.65              | 1.11               | 2.77               | 2.65               | 1.86               | 0.66              | 0.65               |
| Quercetin                | avg | 4.33               | 6.85              | 2.33               | 2.11               | 2.56               | 1.85               | 0.75              | 0.65               |
|                          | sd  | 0.16 <sup>j</sup>  | 0.27 <sup>k</sup> | 0.04 <sup>hi</sup> | 0.05 <sup>gh</sup> | 0.09 <sup>i</sup>  | 0.05 <sup>fg</sup> | 0.05 <sup>b</sup> | 0.06 <sup>b</sup>  |
|                          | RSD | 3.68               | 4.01              | 1.89               | 2.35               | 3.37               | 2.86               | 2.88              | 3.11               |
| Phloretin                | avg | 0.07               | 0.10              | 0.04               | 0.07               | 0.07               | 0.06               | 0.07              | 0.05               |
|                          | sd  | 0.00               | 0.00              | 0.00               | 0.00               | 0.00               | 0.00               | 0.00              | 0.00               |
|                          | RSD | 1.29               | 2.00              | 1.13               | 0.53               | 0.83               | 0.87               | 0.57              | 1.87               |
| Naringenin               | avg | 0.04               | 0.05              | 0.02               | 0.05               | 0.06               | 0.05               | 0.02              | 0.05               |
|                          | sd  | 0.00               | 0.00              | 0.00               | 0.00               | 0.00               | 0.00               | 0.00              | 0.00               |
|                          | RSD | 0.39               | 0.40              | 0.37               | 0.52               | 0.62               | 0.54               | 0.43              | 0.65               |
| Gallic_acid              | avg | 1.14               | 1.43              | 1.32               | 2.33               | 2.69               | 2.00               | 0.34              | 0.40               |
|                          | sd  | 0.01 <sup>e</sup>  | 0.01 <sup>g</sup> | 0.01 <sup>f</sup>  | 0.02 <sup>l</sup>  | 0.08 <sup>n</sup>  | 0.05 <sup>i</sup>  | 0.00 <sup>b</sup> | 0.00 <sup>bc</sup> |
|                          | RSD | 0.63               | 0.68              | 0.83               | 0.75               | 2.90               | 2.29               | 2.11              | 2.86               |

Legend: The results are expressed as mean values of three replicates  $\pm$  standard deviation. Different letters in the same row indicate statistically significant difference at  $p < 0.05$ . RSD (relative standard deviation) Abbreviations: IS - Serbian Chaga, MW 96% EtOH, 50% EtOH, H<sub>2</sub>O - microwave-assisted extraction, VAE 96% EtOH, 50% EtOH, H<sub>2</sub>O - ultrasound-assisted extraction, SWE 200 °C, 120 °C.

**Table S5.** Fatty acid profile of Serbian *I. obliquus* extracts obtained by different green extraction tech-niques mg/100 g.

| mg/100 g               |     | IS-MW 96% ETOH      | IS-MW 50% ETOH      | IS-MW water        | IS-VAE 96% ETOH    | IS-VAE 50% ETOH    | IS-VAE water       | IS-SWE 200°C       | IS-SWE 120°C       |
|------------------------|-----|---------------------|---------------------|--------------------|--------------------|--------------------|--------------------|--------------------|--------------------|
| C4:0 butyric acid      | avg | 0.030               | 0.020               | 0.020              | 0.060              | 0.060              | 0.040              | 0.090              | 0.080              |
|                        | sd  | 0.000 <sup>b</sup>  | 0.000 <sup>a</sup>  | 0.000 <sup>a</sup> | 0.002 <sup>e</sup> | 0.002 <sup>e</sup> | 0.001 <sup>c</sup> | 0.005 <sup>g</sup> | 0.002 <sup>f</sup> |
|                        | RSD | 1.178               | 0.777               | 1.073              | 3.166              | 3.663              | 2.163              | 5.166              | 2.166              |
| C6:0 caproic acid      | avg | 0.020               | 0.030               | 0.010              | 0.040              | 0.040              | 0.020              | 0.090              | 0.040              |
|                        | sd  | 0.000 <sup>b</sup>  | 0.000 <sup>c</sup>  | 0.000 <sup>a</sup> | 0.001 <sup>d</sup> | 0.000 <sup>d</sup> | 0.000 <sup>b</sup> | 0.002 <sup>h</sup> | 0.001 <sup>d</sup> |
|                        | RSD | 1.011               | 1.343               | 1.663              | 1.556              | 1.073              | 0.997              | 2.045              | 3.112              |
| C8:0 caprilic acid     | avg | 0.050               | 0.060               | 0.030              | 0.110              | 0.090              | 0.060              | 0.160              | 0.170              |
|                        | sd  | 0.001 <sup>b</sup>  | 0.002 <sup>c</sup>  | 0.001 <sup>a</sup> | 0.003 <sup>f</sup> | 0.003 <sup>e</sup> | 0.000 <sup>c</sup> | 0.001 <sup>i</sup> | 0.001 <sup>j</sup> |
|                        | RSD | 2.090               | 3.956               | 2.816              | 2.311              | 3.866              | 0.697              | 0.674              | 0.787              |
| C10:0 capric acid      | avg | 0.230               | 0.210               | 0.140              | 0.320              | 0.330              | 0.190              | 0.580              | 0.420              |
|                        | sd  | 0.012 <sup>bc</sup> | 0.013 <sup>bc</sup> | 0.007 <sup>a</sup> | 0.019 <sup>d</sup> | 0.025 <sup>d</sup> | 0.015 <sup>b</sup> | 0.008 <sup>g</sup> | 0.008 <sup>e</sup> |
|                        | RSD | 5.062               | 6.064               | 4.899              | 5.986              | 7.456              | 8.156              | 1.437              | 1.842              |
| C11:0 undeca-noic acid | avg | 0.110               | 0.100               | 0.070              | 0.160              | 0.150              | 0.060              | 0.650              | 0.320              |
|                        | sd  | 0.001 <sup>b</sup>  | 0.001 <sup>b</sup>  | 0.000 <sup>a</sup> | 0.006 <sup>c</sup> | 0.005 <sup>c</sup> | 0.002 <sup>a</sup> | 0.015 <sup>i</sup> | 0.013 <sup>f</sup> |
|                        | RSD | 0.803               | 0.718               | 0.674              | 3.665              | 3.261              | 3.014              | 2.279              | 3.936              |

|                           |     |                     |                      |                     |                     |                     |                     |                     |                    |
|---------------------------|-----|---------------------|----------------------|---------------------|---------------------|---------------------|---------------------|---------------------|--------------------|
| C12:0 lauric acid         | avg | 0.120               | 0.120                | 0.040               | 0.110               | 0.130               | 0.060               | 0.420               | 0.190              |
|                           | sd  | 0.001 <sup>de</sup> | 0.001 <sup>de</sup>  | 0.000 <sup>a</sup>  | 0.001 <sup>d</sup>  | 0.001 <sup>e</sup>  | 0.000 <sup>b</sup>  | 0.000 <sup>k</sup>  | 0.000 <sup>g</sup> |
|                           | RSD | 0.690               | 1.161                | 0.638               | 0.865               | 1.098               | 0.732               | 0.062               | 0.053              |
| C13:0 tridecanoic acid    | avg | 0.040               | 0.030                | 0.020               | 0.050               | 0.050               | 0.020               | 0.140               | 0.110              |
|                           | sd  | 0.001 <sup>bc</sup> | 0.000 <sup>ab</sup>  | 0.000 <sup>a</sup>  | 0.001 <sup>cd</sup> | 0.001 <sup>cd</sup> | 0.000 <sup>a</sup>  | 0.005 <sup>h</sup>  | 0.003 <sup>g</sup> |
|                           | RSD | 1.479               | 0.547                | 1.861               | 2.027               | 2.255               | 0.552               | 3.725               | 3.032              |
| C14:0 myristic acid       | avg | 0.660               | 0.690                | 0.230               | 0.740               | 0.720               | 0.330               | 0.930               | 0.620              |
|                           | sd  | 0.018 <sup>ef</sup> | 0.017 <sup>fg</sup>  | 0.003 <sup>a</sup>  | 0.010 <sup>h</sup>  | 0.015 <sup>gh</sup> | 0.005 <sup>b</sup>  | 0.019 <sup>j</sup>  | 0.015 <sup>e</sup> |
|                           | RSD | 2.790               | 2.468                | 1.416               | 1.376               | 2.097               | 1.651               | 2.033               | 2.411              |
| C14:1 myristoleic acid    | avg | 0.580               | 0.510                | 0.320               | 0.670               | 0.640               | 0.330               | 0.650               | 0.410              |
|                           | sd  | 0.003 <sup>g</sup>  | 0.016 <sup>f</sup>   | 0.007 <sup>b</sup>  | 0.016 <sup>i</sup>  | 0.018 <sup>h</sup>  | 0.001 <sup>b</sup>  | 0.008 <sup>h</sup>  | 0.007 <sup>c</sup> |
|                           | RSD | 0.442               | 3.124                | 2.044               | 2.442               | 2.852               | 0.304               | 1.224               | 1.792              |
| C15:0 pentadecanoic acid  | avg | 0.870               | 0.860                | 0.330               | 0.960               | 1.030               | 0.420               | 1.450               | 1.230              |
|                           | sd  | 0.013 <sup>d</sup>  | 0.020 <sup>d</sup>   | 0.005 <sup>a</sup>  | 0.011 <sup>e</sup>  | 0.017 <sup>g</sup>  | 0.008 <sup>b</sup>  | 0.008 <sup>k</sup>  | 0.010 <sup>j</sup> |
|                           | RSD | 1.548               | 2.330                | 1.484               | 1.182               | 1.628               | 1.990               | 0.536               | 0.842              |
| C15:1 pentadecenoic acid  | avg | 0.060               | 0.050                | 0.020               | 0.030               | 0.020               | 0.010               | 0.120               | 0.080              |
|                           | sd  | 0.000 <sup>e</sup>  | 0.000 <sup>d</sup>   | 0.000 <sup>b</sup>  | 0.000 <sup>c</sup>  | 0.000 <sup>b</sup>  | 0.000 <sup>a</sup>  | 0.001 <sup>h</sup>  | 0.001 <sup>g</sup> |
|                           | RSD | 0.664               | 0.712                | 0.534               | 1.136               | 1.198               | 0.764               | 1.148               | 1.570              |
| C16:0 palmitic acid       | avg | 18.320              | 16.220               | 15.660              | 19.320              | 18.880              | 14.320              | 18.650              | 16.520             |
|                           | sd  | 0.122 <sup>e</sup>  | 0.149 <sup>d</sup>   | 0.101 <sup>cd</sup> | 0.318 <sup>e</sup>  | 0.411 <sup>e</sup>  | 0.228 <sup>b</sup>  | 0.282 <sup>e</sup>  | 0.194 <sup>d</sup> |
|                           | RSD | 0.668               | 0.916                | 0.642               | 1.646               | 2.178               | 1.592               | 1.512               | 1.176              |
| C16:1 palmitoleic acid    | avg | 0.670               | 0.630                | 0.230               | 0.750               | 0.740               | 0.330               | 0.560               | 0.420              |
|                           | sd  | 0.018 <sup>i</sup>  | 0.011 <sup>i</sup>   | 0.001 <sup>a</sup>  | 0.020 <sup>k</sup>  | 0.028 <sup>k</sup>  | 0.001 <sup>d</sup>  | 0.007 <sup>h</sup>  | 0.005 <sup>e</sup> |
|                           | RSD | 2.672               | 1.802                | 0.504               | 2.712               | 3.770               | 0.266               | 1.316               | 1.304              |
| C17:0 margaric acid       | avg | 0.480               | 0.420                | 0.210               | 0.560               | 0.590               | 0.220               | 0.520               | 0.420              |
|                           | sd  | 0.004 <sup>e</sup>  | 0.005 <sup>d</sup>   | 0.004 <sup>a</sup>  | 0.010 <sup>g</sup>  | 0.012 <sup>h</sup>  | 0.004 <sup>a</sup>  | 0.010 <sup>f</sup>  | 0.006 <sup>d</sup> |
|                           | RSD | 0.778               | 1.306                | 1.972               | 1.770               | 2.070               | 1.812               | 1.882               | 1.436              |
| C17:1 heptadecenoic acid  | avg | 0.160               | 0.150                | 0.040               | 0.110               | 0.110               | 0.030               | 0.210               | 0.110              |
|                           | sd  | 0.003 <sup>h</sup>  | 0.004 <sup>g</sup>   | 0.001 <sup>c</sup>  | 0.003 <sup>d</sup>  | 0.004 <sup>d</sup>  | 0.001 <sup>b</sup>  | 0.001 <sup>i</sup>  | 0.000 <sup>d</sup> |
|                           | RSD | 1.856               | 2.957                | 2.152               | 3.012               | 3.995               | 3.442               | 0.289               | 0.258              |
| C18:0 stearic acid        | avg | 6.580               | 6.960                | 3.120               | 7.560               | 7.990               | 4.110               | 5.630               | 4.250              |
|                           | sd  | 0.199 <sup>ef</sup> | 0.301 <sup>efg</sup> | 0.094 <sup>b</sup>  | 0.260 <sup>hi</sup> | 0.380 <sup>i</sup>  | 0.205 <sup>c</sup>  | 0.111 <sup>d</sup>  | 0.086 <sup>c</sup> |
|                           | RSD | 3.018               | 4.325                | 2.998               | 3.441               | 4.756               | 4.998               | 1.963               | 2.022              |
| C18:1 trans-oleic acid    | avg | 0.230               | 0.220                | 0.100               | 0.190               | 0.210               | 0.110               | 0.230               | 0.110              |
|                           | sd  | 0.003 <sup>h</sup>  | 0.003 <sup>gh</sup>  | 0.001 <sup>bc</sup> | 0.010 <sup>f</sup>  | 0.009 <sup>g</sup>  | 0.002 <sup>c</sup>  | 0.005 <sup>h</sup>  | 0.004 <sup>c</sup> |
|                           | RSD | 1.325               | 1.503                | 1.145               | 5.112               | 4.245               | 2.268               | 2.145               | 3.689              |
| C18:1 cis-oleic acid      | avg | 52.320              | 55.630               | 12.360              | 38.250              | 34.520              | 14.220              | 25.630              | 12.360             |
|                           | sd  | 0.583 <sup>h</sup>  | 0.791 <sup>i</sup>   | 0.134 <sup>a</sup>  | 0.989 <sup>ef</sup> | 1.495 <sup>d</sup>  | 0.315 <sup>a</sup>  | 0.425 <sup>c</sup>  | 0.122 <sup>a</sup> |
|                           | RSD | 1.114               | 1.423                | 1.084               | 2.585               | 4.332               | 2.214               | 1.658               | 0.986              |
| C18:2 trans-linoleic acid | avg | 0.070               | 0.070                | 0.020               | 0.080               | 0.060               | 0.040               | 0.060               | 0.050              |
|                           | sd  | 0.004 <sup>f</sup>  | 0.003 <sup>f</sup>   | 0.000 <sup>b</sup>  | 0.002 <sup>g</sup>  | 0.002 <sup>e</sup>  | 0.000 <sup>c</sup>  | 0.001 <sup>e</sup>  | 0.001 <sup>d</sup> |
|                           | RSD | 5.623               | 4.112                | 1.542               | 2.774               | 3.235               | 1.112               | 2.336               | 2.114              |
| C18:2 cis-linoleic acid   | avg | 0.290               | 0.280                | 0.150               | 0.190               | 0.190               | 0.090               | 0.150               | 0.110              |
|                           | sd  | 0.004 <sup>ab</sup> | 0.003 <sup>ab</sup>  | 0.001 <sup>ab</sup> | 0.002 <sup>ab</sup> | 0.001 <sup>ab</sup> | 0.002 <sup>a</sup>  | 0.001 <sup>ab</sup> | 0.001 <sup>a</sup> |
|                           | RSD | 1.021               | 2.356                | 2.985               | 2.114               | 1.985               | 1.665               | 2.883               | 2.898              |
| C18:3 linolenic acid      | avg | 0.240               | 0.230                | 0.120               | 0.180               | 0.190               | 0.080               | 0.160               | 0.110              |
|                           | sd  | 0.006 <sup>g</sup>  | 0.005 <sup>g</sup>   | 0.004 <sup>d</sup>  | 0.006 <sup>f</sup>  | 0.009 <sup>f</sup>  | 0.005 <sup>bc</sup> | 0.008 <sup>e</sup>  | 0.007 <sup>d</sup> |
|                           | RSD | 2.412               | 2.125                | 2.983               | 3.224               | 4.863               | 5.635               | 4.863               | 6.042              |
| C18:3 gamma               | avg | 1.040               | 1.090                | 0.520               | 0.650               | 0.680               | 0.230               | 0.260               | 0.150              |

|                                                     |     |                     |                    |                    |                    |                    |                     |                     |                     |
|-----------------------------------------------------|-----|---------------------|--------------------|--------------------|--------------------|--------------------|---------------------|---------------------|---------------------|
|                                                     | sd  | 0.021 <sup>hi</sup> | 0.036 <sup>i</sup> | 0.022 <sup>e</sup> | 0.013 <sup>f</sup> | 0.024 <sup>f</sup> | 0.010 <sup>c</sup>  | 0.008 <sup>cd</sup> | 0.008 <sup>b</sup>  |
|                                                     | RSD | 2.035               | 3.325              | 4.325              | 1.996              | 3.487              | 4.235               | 3.025               | 5.023               |
| C20:0 arachidic acid                                | avg | 0.350               | 0.380              | 0.210              | 0.540              | 0.560              | 0.240               | 0.230               | 0.150               |
|                                                     | sd  | 0.008 <sup>h</sup>  | 0.013 <sup>h</sup> | 0.003 <sup>f</sup> | 0.022 <sup>i</sup> | 0.035 <sup>i</sup> | 0.011 <sup>fg</sup> | 0.004 <sup>fg</sup> | 0.005 <sup>de</sup> |
|                                                     | RSD | 2.252               | 3.356              | 1.332              | 4.021              | 6.258              | 4.563               | 1.853               | 3.124               |
| C20:1 eicosenoic acid                               | avg | 0.170               | 0.190              | 0.140              | 0.160              | 0.120              | 0.090               | 0.230               | 0.110               |
|                                                     | sd  | 0.003 <sup>e</sup>  | 0.010 <sup>f</sup> | 0.005 <sup>d</sup> | 0.007 <sup>e</sup> | 0.003 <sup>c</sup> | 0.002 <sup>b</sup>  | 0.008 <sup>g</sup>  | 0.002 <sup>c</sup>  |
|                                                     | RSD | 1.896               | 5.423              | 3.321              | 4.658              | 2.332              | 1.996               | 3.562               | 2.112               |
| C20:2 eicosadienoic acid                            | avg | 0.120               | 0.150              | 0.110              | 0.210              | 0.150              | 0.070               | 0.150               | 0.120               |
|                                                     | sd  | 0.004 <sup>c</sup>  | 0.006 <sup>d</sup> | 0.004 <sup>c</sup> | 0.004 <sup>e</sup> | 0.003 <sup>d</sup> | 0.001 <sup>b</sup>  | 0.003 <sup>d</sup>  | 0.003 <sup>c</sup>  |
|                                                     | RSD | 3.658               | 4.321              | 3.323              | 2.142              | 1.785              | 2.036               | 2.065               | 2.498               |
| C21:0 heneicosanoic acid                            | avg | 0.130               | 0.110              | 0.070              | 0.120              | 0.110              | 0.050               | 0.120               | 0.090               |
|                                                     | sd  | 0.003 <sup>g</sup>  | 0.003 <sup>e</sup> | 0.002 <sup>c</sup> | 0.000 <sup>f</sup> | 0.001 <sup>e</sup> | 0.000 <sup>b</sup>  | 0.000 <sup>f</sup>  | 0.000 <sup>d</sup>  |
|                                                     | RSD | 2.256               | 2.853              | 2.996              | 0.285              | 0.998              | 0.743               | 0.233               | 0.284               |
| C20:3 <i>n</i> = 3 cis-11,14,17-eicosatrienoic acid | avg | 0.110               | 0.090              | 0.030              | 0.130              | 0.080              | 0.020               | 0.110               | 0.060               |
|                                                     | sd  | 0.000 <sup>g</sup>  | 0.000 <sup>f</sup> | 0.000 <sup>b</sup> | 0.001 <sup>h</sup> | 0.001 <sup>e</sup> | 0.000 <sup>a</sup>  | 0.000 <sup>g</sup>  | 0.000 <sup>c</sup>  |
|                                                     | RSD | 0.314               | 0.398              | 0.521              | 0.511              | 0.756              | 0.488               | 0.156               | 0.175               |
| C20:4 arachidonic acid                              | avg | 0.180               | 0.150              | 0.080              | 0.090              | 0.070              | 0.040               | 0.150               | 0.080               |
|                                                     | sd  | 0.001 <sup>i</sup>  | 0.000 <sup>h</sup> | 0.000 <sup>e</sup> | 0.000 <sup>f</sup> | 0.000 <sup>d</sup> | 0.000 <sup>b</sup>  | 0.000 <sup>h</sup>  | 0.006 <sup>e</sup>  |
|                                                     | RSD | 0.285               | 0.255              | 0.506              | 0.489              | 0.110              | 0.075               | 0.296               | 7.226               |
| C20:3 <i>n</i> = 6 cis-8,11,14-eicosatrienoic acid  | avg | 0.260               | 0.210              | 0.040              | 0.050              | 0.030              | 0.010               | 0.130               | 0.090               |
|                                                     | sd  | 0.001 <sup>l</sup>  | 0.001 <sup>k</sup> | 0.000 <sup>d</sup> | 0.000 <sup>e</sup> | 0.000 <sup>c</sup> | 0.000 <sup>a</sup>  | 0.001 <sup>i</sup>  | 0.000 <sup>h</sup>  |
|                                                     | RSD | 0.511               | 0.281              | 0.331              | 0.268              | 0.235              | 0.356               | 0.489               | 0.165               |
| C22:0 behenic acid                                  | avg | 0.430               | 0.450              | 0.210              | 0.390              | 0.430              | 0.250               | 0.530               | 0.390               |
|                                                     | sd  | 0.014 <sup>g</sup>  | 0.018 <sup>h</sup> | 0.008 <sup>b</sup> | 0.001 <sup>f</sup> | 0.001 <sup>g</sup> | 0.000 <sup>c</sup>  | 0.003 <sup>j</sup>  | 0.001 <sup>f</sup>  |
|                                                     | RSD | 3.336               | 3.983              | 4.014              | 0.189              | 0.203              | 0.188               | 0.523               | 0.195               |
| C20:5 eicosapentaenoic acid                         | avg | 0.230               | 0.210              | 0.110              | 0.320              | 0.240              | 0.150               | 0.180               | 0.110               |
|                                                     | sd  | 0.001 <sup>i</sup>  | 0.000 <sup>g</sup> | 0.000 <sup>b</sup> | 0.001 <sup>k</sup> | 0.001 <sup>j</sup> | 0.001 <sup>d</sup>  | 0.001 <sup>e</sup>  | 0.001 <sup>b</sup>  |
|                                                     | RSD | 0.245               | 0.223              | 0.325              | 0.332              | 0.425              | 0.665               | 0.283               | 1.245               |
| C22:1 erucic acid                                   | avg | 0.190               | 0.170              | 0.100              | 0.310              | 0.250              | 0.190               | 0.160               | 0.090               |
|                                                     | sd  | 0.002 <sup>j</sup>  | 0.003 <sup>i</sup> | 0.001 <sup>d</sup> | 0.003 <sup>l</sup> | 0.006 <sup>k</sup> | 0.004 <sup>j</sup>  | 0.002 <sup>h</sup>  | 0.001 <sup>c</sup>  |
|                                                     | RSD | 1.104               | 1.548              | 1.442              | 1.124              | 2.326              | 1.886               | 1.083               | 1.653               |
| C22:2 docosadienoic acid                            | avg | 0.530               | 0.480              | 0.360              | 0.480              | 0.190              | 0.330               | 0.250               | 0.140               |
|                                                     | sd  | 0.005 <sup>i</sup>  | 0.010 <sup>i</sup> | 0.004 <sup>h</sup> | 0.008 <sup>i</sup> | 0.005 <sup>c</sup> | 0.010 <sup>g</sup>  | 0.000 <sup>e</sup>  | 0.000 <sup>b</sup>  |
|                                                     | RSD | 1.021               | 2.032              | 0.996              | 1.563              | 2.441              | 2.896               | 0.189               | 0.252               |
| C23:0 tricosanoic acid                              | avg | 0.560               | 0.510              | 0.310              | 0.560              | 0.470              | 0.350               | 0.360               | 0.250               |
|                                                     | sd  | 0.013 <sup>l</sup>  | 0.004 <sup>k</sup> | 0.002 <sup>e</sup> | 0.006 <sup>l</sup> | 0.005 <sup>j</sup> | 0.007 <sup>gh</sup> | 0.006 <sup>h</sup>  | 0.008 <sup>bc</sup> |
|                                                     | RSD | 2.331               | 0.752              | 0.552              | 1.025              | 0.998              | 1.885               | 1.589               | 3.057               |
| C24:0 lignoseric acid                               | avg | 0.420               | 0.440              | 0.210              | 0.590              | 0.510              | 0.330               | 0.420               | 0.360               |
|                                                     | sd  | 0.002 <sup>g</sup>  | 0.002 <sup>h</sup> | 0.001 <sup>a</sup> | 0.002 <sup>j</sup> | 0.002 <sup>i</sup> | 0.001 <sup>d</sup>  | 0.008 <sup>g</sup>  | 0.004 <sup>f</sup>  |
|                                                     | RSD | 0.452               | 0.568              | 0.402              | 0.352              | 0.458              | 0.336               | 1.986               | 1.112               |
| C22:6 docosahexaenoic acid                          | avg | 0.510               | 0.530              | 0.390              | 0.610              | 0.580              | 0.430               | 0.590               | 0.410               |
|                                                     | sd  | 0.005 <sup>g</sup>  | 0.004 <sup>h</sup> | 0.003 <sup>d</sup> | 0.004 <sup>k</sup> | 0.006 <sup>j</sup> | 0.004 <sup>f</sup>  | 0.007 <sup>j</sup>  | 0.004 <sup>e</sup>  |
|                                                     | RSD | 0.989               | 0.711              | 0.893              | 0.689              | 0.998              | 1.001               | 1.114               | 1.012               |

Legend: The results are expressed as mean values of three replicates  $\pm$  standard deviation. RSD (relative standard deviation). Different letters in the same row indicate statistically significant difference at  $p < 0.05$ . Abbreviations: IS - Serbian Chaga, MW 96% EtOH, 50% EtOH, H<sub>2</sub>O - microwave-assisted extraction, VAE 96% EtOH, 50% EtOH, H<sub>2</sub>O - ultrasound-assisted extraction, SWE 200 °C, 120 °C.

**Table S6.** Fatty acid profile of Mongolian *I. obliquus* extracts obtained by different green extraction techniques mg/100 g.

| mg/100 g                      |     | IM-MW<br>96%ETOH    | IM-MW<br>50%<br>ETOH | IM-<br>MW<br>water  | IM-<br>VAE<br>96%<br>ETOH | IM-<br>VAE<br>50%<br>ETOH | IM-<br>VAE<br>water | IM-<br>SWE<br>200°C | IM-<br>SWE<br>120°C |
|-------------------------------|-----|---------------------|----------------------|---------------------|---------------------------|---------------------------|---------------------|---------------------|---------------------|
| C4:0 butyric acid             | avg | 0.090               | 0.110                | 0.060               | 0.050                     | 0.050                     | 0.030               | 0.110               | 0.100               |
|                               | sd  | 0.002 <sup>g</sup>  | 0.001 <sup>i</sup>   | 0.001 <sup>e</sup>  | 0.001 <sup>d</sup>        | 0.002 <sup>d</sup>        | 0.001 <sup>b</sup>  | 0.001 <sup>i</sup>  | 0.001 <sup>h</sup>  |
|                               | RSD | 1.999               | 0.666                | 0.998               | 2.845                     | 3.162                     | 3.668               | 1.239               | 0.968               |
| C6:0 caproic acid             | avg | 0.080               | 0.070                | 0.050               | 0.090                     | 0.080                     | 0.040               | 0.110               | 0.080               |
|                               | sd  | 0.001 <sup>g</sup>  | 0.001 <sup>f</sup>   | 0.001 <sup>e</sup>  | 0.001 <sup>h</sup>        | 0.002 <sup>g</sup>        | 0.001 <sup>d</sup>  | 0.002 <sup>i</sup>  | 0.001 <sup>g</sup>  |
|                               | RSD | 1.345               | 1.228                | 1.493               | 1.371                     | 1.896                     | 2.331               | 1.852               | 1.452               |
| C8:0 caprylic acid            | avg | 0.150               | 0.130                | 0.080               | 0.130                     | 0.110                     | 0.080               | 0.150               | 0.180               |
|                               | sd  | 0.001 <sup>h</sup>  | 0.004 <sup>g</sup>   | 0.001 <sup>d</sup>  | 0.006 <sup>g</sup>        | 0.005 <sup>f</sup>        | 0.004 <sup>d</sup>  | 0.001 <sup>h</sup>  | 0.006 <sup>k</sup>  |
|                               | RSD | 0.920               | 3.194                | 0.948               | 4.899                     | 4.999                     | 5.426               | 0.568               | 3.326               |
| C10:0 capric acid             | avg | 0.480               | 0.490                | 0.240               | 0.330                     | 0.360                     | 0.140               | 0.630               | 0.520               |
|                               | sd  | 0.019 <sup>f</sup>  | 0.023 <sup>f</sup>   | 0.007 <sup>c</sup>  | 0.001 <sup>d</sup>        | 0.002 <sup>d</sup>        | 0.001 <sup>a</sup>  | 0.009 <sup>h</sup>  | 0.012 <sup>f</sup>  |
|                               | RSD | 3.936               | 4.778                | 2.965               | 0.366                     | 0.457                     | 0.386               | 1.395               | 2.281               |
| C11:0 undeca-<br>noic acid    | avg | 0.210               | 0.230                | 0.110               | 0.250                     | 0.210                     | 0.110               | 0.530               | 0.410               |
|                               | sd  | 0.006 <sup>d</sup>  | 0.003 <sup>de</sup>  | 0.002 <sup>b</sup>  | 0.004 <sup>e</sup>        | 0.006 <sup>d</sup>        | 0.002 <sup>b</sup>  | 0.012 <sup>h</sup>  | 0.005 <sup>g</sup>  |
|                               | RSD | 2.816               | 1.423                | 1.950               | 1.486                     | 2.708                     | 2.185               | 2.255               | 1.299               |
| C12:0 lauric acid             | avg | 0.180               | 0.170                | 0.070               | 0.230                     | 0.220                     | 0.080               | 0.330               | 0.210               |
|                               | sd  | 0.008 <sup>fg</sup> | 0.009 <sup>f</sup>   | 0.003 <sup>bc</sup> | 0.007 <sup>i</sup>        | 0.006 <sup>hi</sup>       | 0.000 <sup>c</sup>  | 0.015 <sup>j</sup>  | 0.011 <sup>h</sup>  |
|                               | RSD | 4.432               | 5.312                | 4.278               | 2.979                     | 2.697                     | 0.044               | 4.568               | 5.128               |
| C13:0 tride-<br>canoic acid   | avg | 0.060               | 0.070                | 0.030               | 0.080                     | 0.080                     | 0.400               | 0.130               | 0.110               |
|                               | sd  | 0.000 <sup>de</sup> | 0.002 <sup>ef</sup>  | 0.001 <sup>ab</sup> | 0.002 <sup>f</sup>        | 0.003 <sup>f</sup>        | 0.013 <sup>i</sup>  | 0.002 <sup>h</sup>  | 0.001 <sup>g</sup>  |
|                               | RSD | 0.519               | 2.258                | 3.056               | 3.035                     | 3.580                     | 3.266               | 1.320               | 1.242               |
| C14:0 myristic<br>acid        | avg | 0.810               | 0.830                | 0.320               | 0.720                     | 0.750                     | 0.410               | 0.840               | 0.520               |
|                               | sd  | 0.021 <sup>i</sup>  | 0.012 <sup>j</sup>   | 0.006 <sup>b</sup>  | 0.012 <sup>gh</sup>       | 0.012 <sup>h</sup>        | 0.008 <sup>c</sup>  | 0.022 <sup>j</sup>  | 0.016 <sup>d</sup>  |
|                               | RSD | 2.556               | 1.492                | 1.775               | 1.623                     | 1.542                     | 1.985               | 2.568               | 3.124               |
| C14:1<br>myristoleic acid     | avg | 0.480               | 0.440                | 0.210               | 0.520                     | 0.530                     | 0.220               | 0.670               | 0.320               |
|                               | sd  | 0.007 <sup>e</sup>  | 0.017 <sup>d</sup>   | 0.003 <sup>a</sup>  | 0.007 <sup>f</sup>        | 0.008 <sup>f</sup>        | 0.004 <sup>a</sup>  | 0.008 <sup>i</sup>  | 0.003 <sup>b</sup>  |
|                               | RSD | 1.522               | 3.790                | 1.316               | 1.424                     | 1.578                     | 1.624               | 1.266               | 0.796               |
| C15:0 pentadeca-<br>noic acid | avg | 0.990               | 1.010                | 0.330               | 1.150                     | 1.080                     | 0.520               | 1.660               | 1.110               |
|                               | sd  | 0.012 <sup>ef</sup> | 0.016 <sup>fg</sup>  | 0.004 <sup>a</sup>  | 0.005 <sup>i</sup>        | 0.007 <sup>h</sup>        | 0.003 <sup>c</sup>  | 0.008 <sup>l</sup>  | 0.012 <sup>h</sup>  |
|                               | RSD | 1.226               | 1.622                | 1.104               | 0.464                     | 0.622                     | 0.596               | 0.470               | 1.072               |
| C15:1 pen-<br>tadesenoic acid | avg | 0.080               | 0.070                | 0.020               | 0.090                     | 0.060                     | 0.020               | 0.140               | 0.090               |
|                               | sd  | 0.001 <sup>g</sup>  | 0.001 <sup>f</sup>   | 0.000 <sup>b</sup>  | 0.001 <sup>h</sup>        | 0.000 <sup>e</sup>        | 0.000 <sup>b</sup>  | 0.001 <sup>j</sup>  | 0.001 <sup>h</sup>  |
|                               | RSD | 0.756               | 1.316                | 1.792               | 1.224                     | 0.650                     | 0.258               | 1.046               | 0.904               |
| C16:0 palmitic<br>acid        | avg | 14.630              | 13.890               | 10.320              | 15.630                    | 16.010                    | 10.630              | 21.350              | 18.630              |
|                               | sd  | 0.231 <sup>bc</sup> | 0.293 <sup>b</sup>   | 0.153 <sup>a</sup>  | 0.059 <sup>cd</sup>       | 0.052 <sup>d</sup>        | 0.139 <sup>a</sup>  | 0.800 <sup>e</sup>  | 0.869 <sup>e</sup>  |
|                               | RSD | 1.578               | 2.112                | 1.482               | 0.378                     | 0.326                     | 1.306               | 3.748               | 4.664               |
| C16:1 pal-<br>mitoleic acid   | avg | 0.530               | 0.490                | 0.210               | 0.280                     | 0.290                     | 0.180               | 0.630               | 0.510               |
|                               | sd  | 0.001 <sup>gh</sup> | 0.007 <sup>f</sup>   | 0.004 <sup>ab</sup> | 0.002 <sup>c</sup>        | 0.003 <sup>c</sup>        | 0.002 <sup>a</sup>  | 0.012 <sup>i</sup>  | 0.010 <sup>fg</sup> |
|                               | RSD | 0.272               | 1.430                | 1.748               | 0.824                     | 1.046                     | 1.094               | 1.926               | 1.906               |
| C17:0 margaric<br>acid        | avg | 0.620               | 0.650                | 0.250               | 0.710                     | 0.760                     | 0.320               | 0.680               | 0.520               |
|                               | sd  | 0.004 <sup>i</sup>  | 0.005 <sup>j</sup>   | 0.002 <sup>b</sup>  | 0.005 <sup>l</sup>        | 0.010 <sup>m</sup>        | 0.007 <sup>c</sup>  | 0.009 <sup>k</sup>  | 0.010 <sup>f</sup>  |
|                               | RSD | 0.712               | 0.698                | 0.846               | 0.730                     | 1.296                     | 2.110               | 1.308               | 1.982               |
|                               | avg | 0.160               | 0.140                | 0.030               | 0.110                     | 0.110                     | 0.020               | 0.190               | 0.130               |

|                                                              |     |                     |                     |                     |                      |                     |                    |                     |                     |
|--------------------------------------------------------------|-----|---------------------|---------------------|---------------------|----------------------|---------------------|--------------------|---------------------|---------------------|
| C17:1 hep-<br>tadesenoic acid                                | sd  | 0.006 <sup>h</sup>  | 0.002 <sup>f</sup>  | 0.001 <sup>b</sup>  | 0.003 <sup>d</sup>   | 0.003 <sup>d</sup>  | 0.001 <sup>a</sup> | 0.000 <sup>i</sup>  | 0.003 <sup>e</sup>  |
|                                                              | RSD | 3.562               | 1.553               | 2.856               | 2.994                | 2.452               | 3.325              | 0.241               | 2.141               |
| C18:0 stearic<br>acid                                        | avg | 6.420               | 6.56                | 3.880               | 7.010                | 7.230               | 4.110              | 2.530               | 2.110               |
|                                                              | sd  | 0.227 <sup>e</sup>  | 0.156 <sup>ef</sup> | 0.121 <sup>c</sup>  | 0.130 <sup>fgh</sup> | 0.161 <sup>gh</sup> | 0.084 <sup>c</sup> | 0.045 <sup>a</sup>  | 0.068 <sup>a</sup>  |
|                                                              | RSD | 3.542               | 2.371               | 3.114               | 1.852                | 2.231               | 2.035              | 1.785               | 3.221               |
| C18:1 trans-oleic<br>acid                                    | avg | 0.180               | 0.190               | 0.090               | 0.150                | 0.130               | 0.040              | 0.250               | 0.160               |
|                                                              | sd  | 0.004 <sup>f</sup>  | 0.004 <sup>f</sup>  | 0.003 <sup>b</sup>  | 0.003 <sup>e</sup>   | 0.002 <sup>d</sup>  | 0.000 <sup>a</sup> | 0.005 <sup>i</sup>  | 0.002 <sup>e</sup>  |
|                                                              | RSD | 2.310               | 2.289               | 2.986               | 2.199                | 1.422               | 0.785              | 2.002               | 1.458               |
| C18:1 cis-oleic<br>acid                                      | avg | 48.630              | 49.210              | 21.330              | 36.520               | 39.780              | 14.330             | 35.850              | 12.230              |
|                                                              | sd  | 1.408 <sup>g</sup>  | 1.636 <sup>g</sup>  | 0.523 <sup>b</sup>  | 1.676 <sup>de</sup>  | 1.295 <sup>f</sup>  | 0.159 <sup>a</sup> | 0.881 <sup>de</sup> | 0.381 <sup>a</sup>  |
|                                                              | RSD | 2.896               | 3.325               | 2.452               | 4.589                | 3.256               | 1.112              | 2.458               | 3.114               |
| C18:2 trans-lino-<br>leic acid                               | avg | 0.070               | 0.060               | 0.020               | 0.080                | 0.040               | 0.020              | 0.010               | 0.010               |
|                                                              | sd  | 0.001 <sup>f</sup>  | 0.001 <sup>e</sup>  | 0.000 <sup>b</sup>  | 0.002 <sup>g</sup>   | 0.001 <sup>c</sup>  | 0.000 <sup>b</sup> | 0.000 <sup>a</sup>  | 0.000 <sup>a</sup>  |
|                                                              | RSD | 1.085               | 0.989               | 1.254               | 2.117                | 3.256               | 1.985              | 1.236               | 1.023               |
| C18:2 cis-linoleic<br>acid                                   | avg | 1.109               | 1.526               | 1.996               | 0.223                | 0.356               | 0.452              | 0.388               | 0.345               |
|                                                              | sd  | 0.210 <sup>c</sup>  | 0.230 <sup>d</sup>  | 0.090 <sup>e</sup>  | 0.150 <sup>ab</sup>  | 0.160 <sup>ab</sup> | 0.080 <sup>b</sup> | 0.100 <sup>ab</sup> | 0.090 <sup>ab</sup> |
|                                                              | RSD | 2.852               | 2.481               | 3.256               | 2.856                | 2.542               | 3.952              | 3.256               | 2.921               |
| C18:3 linolenic<br>acid                                      | avg | 0.180               | 0.160               | 0.080               | 0.090                | 0.080               | 0.020              | 0.120               | 0.070               |
|                                                              | sd  | 0.009 <sup>f</sup>  | 0.008 <sup>e</sup>  | 0.005 <sup>bc</sup> | 0.002 <sup>c</sup>   | 0.004 <sup>bc</sup> | 0.001 <sup>a</sup> | 0.011 <sup>d</sup>  | 0.006 <sup>b</sup>  |
|                                                              | RSD | 5.114               | 5.032               | 6.521               | 2.021                | 5.003               | 7.065              | 8.768               | 9.032               |
| C18:3 gamma                                                  | avg | 0.990               | 0.850               | 0.140               | 0.120                | 0.150               | 0.050              | 0.310               | 0.140               |
|                                                              | sd  | 0.032 <sup>h</sup>  | 0.009 <sup>g</sup>  | 0.003 <sup>b</sup>  | 0.002 <sup>b</sup>   | 0.002 <sup>b</sup>  | 0.002 <sup>a</sup> | 0.014 <sup>d</sup>  | 0.006 <sup>b</sup>  |
|                                                              | RSD | 3.225               | 1.023               | 1.856               | 1.562                | 1.335               | 3.253              | 4.633               | 4.589               |
| C20:0 arachidic<br>acid                                      | avg | 0.150               | 0.160               | 0.080               | 0.130                | 0.110               | 0.060              | 0.260               | 0.120               |
|                                                              | sd  | 0.003 <sup>de</sup> | 0.003 <sup>e</sup>  | 0.001 <sup>ab</sup> | 0.008 <sup>cde</sup> | 0.003 <sup>bc</sup> | 0.002 <sup>a</sup> | 0.004 <sup>g</sup>  | 0.004 <sup>cd</sup> |
|                                                              | RSD | 2.325               | 1.856               | 1.221               | 6.214                | 2.956               | 3.889              | 1.623               | 3.224               |
| C20:1 eicosenoic<br>acid                                     | avg | 0.110               | 0.120               | 0.040               | 0.080                | 0.080               | 0.050              | 0.230               | 0.140               |
|                                                              | sd  | 0.003 <sup>c</sup>  | 0.004 <sup>c</sup>  | 0.001 <sup>a</sup>  | 0.002 <sup>b</sup>   | 0.003 <sup>b</sup>  | 0.002 <sup>a</sup> | 0.005 <sup>g</sup>  | 0.003 <sup>d</sup>  |
|                                                              | RSD | 2.358               | 3.124               | 2.258               | 2.998                | 3.385               | 3.118              | 2.325               | 1.996               |
| C20:2 eicosadi-<br>enoic acid                                | avg | 0.080               | 0.070               | 0.050               | 0.110                | 0.120               | 0.080              | 0.180               | 0.140               |
|                                                              | sd  | 0.001 <sup>b</sup>  | 0.001 <sup>b</sup>  | 0.001 <sup>a</sup>  | 0.004 <sup>c</sup>   | 0.004 <sup>c</sup>  | 0.002 <sup>b</sup> | 0.004 <sup>e</sup>  | 0.005 <sup>d</sup>  |
|                                                              | RSD | 1.089               | 0.996               | 2.325               | 3.326                | 2.998               | 2.323              | 2.331               | 3.332               |
| C21:0 heneicosa-<br>noic acid                                | avg | 0.130               | 0.150               | 0.070               | 0.090                | 0.090               | 0.030              | 0.140               | 0.090               |
|                                                              | sd  | 0.001 <sup>g</sup>  | 0.001 <sup>i</sup>  | 0.001 <sup>c</sup>  | 0.000 <sup>d</sup>   | 0.001 <sup>d</sup>  | 0.000 <sup>a</sup> | 0.000 <sup>h</sup>  | 0.000 <sup>d</sup>  |
|                                                              | RSD | 0.712               | 0.963               | 0.822               | 0.426                | 0.689               | 0.411              | 0.314               | 0.114               |
| C20:3 <i>n</i> = 3 cis-<br>11,14,17-eicosa-<br>trienoic acid | avg | 0.140               | 0.140               | 0.080               | 0.060                | 0.070               | 0.020              | 0.150               | 0.020               |
|                                                              | sd  | 0.001 <sup>i</sup>  | 0.001 <sup>i</sup>  | 0.000 <sup>e</sup>  | 0.000 <sup>c</sup>   | 0.000 <sup>d</sup>  | 0.000 <sup>a</sup> | 0.000 <sup>j</sup>  | 0.000 <sup>a</sup>  |
|                                                              | RSD | 0.433               | 0.568               | 0.612               | 0.441                | 0.562               | 0.411              | 0.163               | 0.085               |
| C20:4 arachi-<br>donic acid                                  | avg | 0.060               | 0.040               | 0.030               | 0.070                | 0.070               | 0.030              | 0.130               | 0.090               |
|                                                              | sd  | 0.000 <sup>c</sup>  | 0.000 <sup>b</sup>  | 0.000 <sup>a</sup>  | 0.000 <sup>d</sup>   | 0.000 <sup>d</sup>  | 0.000 <sup>a</sup> | 0.005 <sup>g</sup>  | 0.000 <sup>f</sup>  |
|                                                              | RSD | 0.163               | 0.141               | 0.285               | 0.293                | 0.288               | 0.355              | 3.526               | 0.523               |
| C20:3 <i>n</i> = 6 cis-<br>8,11,14-eicosa-<br>trienoic acid  | avg | 0.060               | 0.060               | 0.010               | 0.050                | 0.050               | 0.020              | 0.110               | 0.070               |
|                                                              | sd  | 0.000 <sup>f</sup>  | 0.000 <sup>f</sup>  | 0.000 <sup>a</sup>  | 0.000 <sup>e</sup>   | 0.000 <sup>e</sup>  | 0.000 <sup>b</sup> | 0.000 <sup>i</sup>  | 0.000 <sup>g</sup>  |
|                                                              | RSD | 0.204               | 0.432               | 0.568               | 0.399                | 0.523               | 0.632              | 0.174               | 0.235               |
| C22:0 behenic<br>acid                                        | avg | 0.360               | 0.900               | 0.150               | 0.320                | 0.360               | 0.210              | 0.480               | 0.210               |
|                                                              | sd  | 0.001 <sup>f</sup>  | 0.005 <sup>k</sup>  | 0.001 <sup>a</sup>  | 0.003 <sup>d</sup>   | 0.004 <sup>f</sup>  | 0.001 <sup>b</sup> | 0.001 <sup>i</sup>  | 0.001 <sup>b</sup>  |
|                                                              | RSD | 0.332               | 0.568               | 0.865               | 0.998                | 1.024               | 0.487              | 0.206               | 0.336               |
| C20:5 eicosapen-<br>taenoic acid                             | avg | 0.190               | 0.140               | 0.080               | 0.230                | 0.220               | 0.110              | 0.220               | 0.150               |
|                                                              | sd  | 0.001 <sup>f</sup>  | 0.000 <sup>c</sup>  | 0.000 <sup>a</sup>  | 0.001 <sup>i</sup>   | 0.001 <sup>h</sup>  | 0.000 <sup>b</sup> | 0.006 <sup>h</sup>  | 0.003 <sup>d</sup>  |

|                                     |     |                    |                    |                    |                    |                     |                    |                    |                     |
|-------------------------------------|-----|--------------------|--------------------|--------------------|--------------------|---------------------|--------------------|--------------------|---------------------|
|                                     | RSD | 0.542              | 0.213              | 0.135              | 0.356              | 0.331               | 0.368              | 2.896              | 2.114               |
| C22:1 erucic acid                   | avg | 0.150              | 0.120              | 0.070              | 0.100              | 0.090               | 0.060              | 0.160              | 0.110               |
|                                     | sd  | 0.001 <sup>g</sup> | 0.002 <sup>f</sup> | 0.001 <sup>b</sup> | 0.001 <sup>d</sup> | 0.001 <sup>c</sup>  | 0.001 <sup>a</sup> | 0.002 <sup>h</sup> | 0.002 <sup>e</sup>  |
|                                     | RSD | 0.993              | 1.856              | 0.874              | 1.125              | 1.563               | 1.983              | 1.112              | 1.941               |
| C22:2 docosadi-<br>enoic acid       | avg | 0.250              | 0.210              | 0.180              | 0.190              | 0.150               | 0.110              | 0.290              | 0.210               |
|                                     | sd  | 0.001 <sup>e</sup> | 0.002 <sup>d</sup> | 0.001 <sup>c</sup> | 0.001 <sup>c</sup> | 0.002 <sup>b</sup>  | 0.001 <sup>a</sup> | 0.001 <sup>f</sup> | 0.002 <sup>d</sup>  |
|                                     | RSD | 0.452              | 0.883              | 0.398              | 0.623              | 1.124               | 0.853              | 0.177              | 1.022               |
| C23:0 tricosanoic<br>acid           | avg | 0.290              | 0.260              | 0.230              | 0.420              | 0.340               | 0.260              | 0.330              | 0.240               |
|                                     | sd  | 0.005 <sup>d</sup> | 0.003 <sup>c</sup> | 0.005 <sup>a</sup> | 0.005 <sup>i</sup> | 0.002 <sup>fg</sup> | 0.001 <sup>c</sup> | 0.004 <sup>f</sup> | 0.001 <sup>ab</sup> |
|                                     | RSD | 1.632              | 1.256              | 2.325              | 1.268              | 0.562               | 0.421              | 1.121              | 0.401               |
| C24:0 lignoseric<br>acid            | avg | 0.230              | 0.250              | 0.210              | 0.350              | 0.360               | 0.210              | 0.510              | 0.420               |
|                                     | sd  | 0.002 <sup>b</sup> | 0.003 <sup>c</sup> | 0.002 <sup>a</sup> | 0.001 <sup>e</sup> | 0.002 <sup>f</sup>  | 0.003 <sup>a</sup> | 0.001 <sup>i</sup> | 0.001 <sup>g</sup>  |
|                                     | RSD | 0.993              | 1.256              | 0.945              | 0.423              | 0.554               | 1.325              | 0.258              | 0.347               |
| C22:6 do-<br>cosaheptaenoic<br>acid | avg | 0.510              | 0.560              | 0.330              | 0.370              | 0.390               | 0.260              | 0.630              | 0.510               |
|                                     | sd  | 0.005 <sup>g</sup> | 0.003 <sup>i</sup> | 0.002 <sup>b</sup> | 0.003 <sup>c</sup> | 0.003 <sup>d</sup>  | 0.002 <sup>a</sup> | 0.004 <sup>l</sup> | 0.003 <sup>g</sup>  |
|                                     | RSD | 0.997              | 0.604              | 0.689              | 0.699              | 0.741               | 0.883              | 0.652              | 0.526               |

Legend: The results are expressed as mean values of three replicates  $\pm$  standard deviation. RSD (relative standard deviation). Different letters in the same row indicate statistically significant difference at  $p < 0.05$ . Abbreviations: IS - Serbian Chaga, MW 96% EtOH, 50% EtOH, H<sub>2</sub>O - microwave-assisted extraction, VAE 96% EtOH, 50% EtOH, H<sub>2</sub>O - ultrasound-assisted extraction, SWE 200 °C, 120 °C.
